# Supplementary material for: Developing professional caregivers’ empathy and emotional competencies through mindfulness-based stress reduction (MBSR): results of two proof-of-concept studies
Source: PubMed Central journal article supplement — BMJ Open. 2018 Jan 5;8(1):e018421. doi: 10.1136/bmjopen-2017-018421 (PMC5781061; doi:10.1136/bmjopen-2017-018421), 2018-01-05
Supplement: bmjopen-2017-018421.draft_revisions.pdf [file bmjopen-2017-018421.draft_revisions.pdf]

# BMJ Open

BMJ Open is committed to open peer review. As part of this commitment we make the peer review history of every article we publish publicly available.

When an article is published we post the peer reviewers' comments and the authors' responses online. We also post the versions of the paper that were used during peer review. These are the versions that the peer review comments apply to.

The versions of the paper that follow are the versions that were submitted during the peer review process. They are not the versions of record or the final published versions. They should not be cited or distributed as the published version of this manuscript.

BMJ Open is an open access journal and the full, final, typeset and author-corrected version of record of the manuscript is available on our site with no access controls, subscription charges or pay-per-view fees (<http://bmjopen.bmj.com>).

If you have any questions on BMJ Open's open peer review process please email [editorial.bmjopen@bmj.com](mailto:editorial.bmjopen@bmj.com)

# BMJ Open

## Developing Professional Caregivers' Empathy and Emotional Competencies Through Mindfulness-Based Stress Reduction (MBSR): Results of two Proof-of-Concept Studies

|                                 |                                                                                                                                                                                                                                                                                                                                                                                                                     |
|---------------------------------|---------------------------------------------------------------------------------------------------------------------------------------------------------------------------------------------------------------------------------------------------------------------------------------------------------------------------------------------------------------------------------------------------------------------|
| Journal:                        | <i>BMJ Open</i>                                                                                                                                                                                                                                                                                                                                                                                                     |
| Manuscript ID                   | bmjopen-2017-018421                                                                                                                                                                                                                                                                                                                                                                                                 |
| Article Type:                   | Research                                                                                                                                                                                                                                                                                                                                                                                                            |
| Date Submitted by the Author:   | 30-Jun-2017                                                                                                                                                                                                                                                                                                                                                                                                         |
| Complete List of Authors:       | Lamothe, Martin; University of Montreal, Department of Psychology<br>McDuff, Pierre; University of Montreal, Department of Psychology<br>Pastore, Yves ; Centre Hospitalier Universitaire Sainte-Justine, Department of Hematology-Oncology<br>Duval, Michel; Centre Hospitalier Universitaire Sainte-Justine, Department of Hematology-Oncology<br>Sultan, Serge; University of Montreal, Department of Psychology |
| <b>Primary Subject Heading</b>: | Patient-centred medicine                                                                                                                                                                                                                                                                                                                                                                                            |
| Secondary Subject Heading:      | Complementary medicine                                                                                                                                                                                                                                                                                                                                                                                              |
| Keywords:                       | Mindfulness-Based Stress Reduction, Haematology-Oncology, emotional competence, Emotional Competence, Profesional Caregivers                                                                                                                                                                                                                                                                                        |
|                                 |                                                                                                                                                                                                                                                                                                                                                                                                                     |

SCHOLARONE™  
Manuscripts

**Title of the article:**

Developing Professional Caregivers' Empathy and Emotional Competencies Through Mindfulness-Based Stress Reduction (MBSR): Results of two Proof-of-Concept Studies

Martin Lamothe<sup>1,2</sup>, Pierre McDuff<sup>2</sup>, Yves D. Pastore<sup>1,3,4</sup>, Michel Duval<sup>1,3,4</sup>, Serge Sultan<sup>1,2,3,4</sup>

<sup>1</sup> Charles Bruneau Cancer Care Centre, CHU Sainte-Justine, Montreal, Qc, Canada

<sup>2</sup> Department of Psychology, Université de Montréal, Montreal, Qc, Canada

<sup>3</sup> Department of Pediatrics, Université de Montréal, Montreal, Qc, Canada

<sup>4</sup> Department of Hematology-Oncology, CHU Sainte-Justine, Montreal, Qc, Canada

**Corresponding author:**

Martin Lamothe

Université de Montréal  
Pavillon Marie-Victorin PO Box 6128  
Succursale Centre-ville  
Montreal (Quebec)  
CANADA H3C 3J7

E-mail: [martin.lamothe@umontreal.ca](mailto:martin.lamothe@umontreal.ca)

Telephone: 514-273-1659

**Authors' information:**

Martin Lamothe, PhD Candidate

Michel Duval, MD

Pierre McDuff, MSc

Yves D. Pastore, MD

Serge Sultan, PhD

**4) Word count:**

4293 words

## ABSTRACT

**Objectives:** To assess the feasibility and acceptability of an MBSR-based intervention and determine if the intervention is associated with a significant signal on empathy and emotional competencies.

**Design:** Two pre-post proof-of-concept studies.

**Setting:** Participants were recruited at the University of Montreal's Psychology Department (Study 1) and the CHU Sainte-Justine Department of Hematology-Oncology (Study 2).

**Participants:** Study 1: 12 students completed the 8-week program (mean age 24, range 18–34). Study 2: 25 professionals completed the 8-week program (mean age 48, range 27–63).

**Intervention:** Standard MBSR program including 8-week mindfulness program consisting of 8 consecutive weekly 2-hour sessions and a full-day silent retreat.

**Outcomes measures:** Mindfulness as measured by the Mindful Attention Awareness Scale (MAAS); empathy as measured by the Interpersonal Reactivity Index (IRI)'s Perspective Taking and Empathic Concern subscales; identification of one's own emotions and those of others as measured by the Profile of Emotional Competence (PEC)'s Identify my Emotions and Identify Others' Emotions subscales; emotional acceptance as measured by the Acceptance and Action Questionnaire-II (AAQ-II) and the Emotion Regulation Scale (ERQ)'s Expressive Suppression subscale; and recognition of emotions in others as measured by the Geneva Emotion Recognition Test (GERT).

**Results:** In both studies, retention rates (80%–81%) were acceptable. Participants who completed the program improved on all measures except the PEC's Identify Others'

1  
2  
3 Emotions and the IRI's Empathic Concern (Cohen's  $d$  median = .92, range .45–1.72). In  
4  
5 study 2, favourable effects associated with the program were maintained over 3 months  
6  
7  
8 on the PEC's Identify my Emotions, the AAQ-II, the ERQ's Expressive Suppression, and  
9  
10 the GERT.  
11

12  
13 **Conclusions:** The program was feasible and acceptable. It was associated with a  
14  
15 significant signal on the following outcomes: perspective taking, the identification of  
16  
17 one's own emotions, and emotional acceptance thus justifying moving towards efficacy  
18  
19 trials using these outcomes.  
20  
21

22 **Keywords:** Mindfulness-based stress reduction, haematology-oncology, empathy,  
23  
24 emotional competence, professional caregivers  
25  
26  
27  
28

## 29 **STRENGTHS AND LIMITATIONS OF THIS STUDY**

### 30

- 31  
32 • Two feasibility studies of an MBSR-based intervention in students and  
33  
34 professionals had high attendance rates and acceptability levels.  
35  
36
- 37 • Results suggested a significant clinical signal on most measured outcomes in the  
38  
39 domains of emotion regulation and empathy, with effects lasting at follow-up for  
40  
41 identification of one's own emotions and emotional acceptance.  
42  
43
- 44 • The same pattern of results was obtained in two independent small-scale studies.  
45  
46
- 47 • A limitation to these studies is that samples were not randomly selected, had  
48  
49 limited size, and no control groups were used.  
50  
51
- 52 • Another limitation is that most outcomes were self-reported and could be subject  
53  
54 to desirability bias.  
55  
56  
57  
58  
59  
60

## INTRODUCTION

In professional caregivers, empathy and its related emotional processes have been recognized as being of utmost importance[1]. Empathy has been described as a multidimensional construct that encompasses the ability to cognitively adopt another person's point of view (perspective taking) and the tendency to experience other-oriented feelings such as compassion and concern (empathic concern)[2]. It has been suggested that higher empathy relates to better health outcomes in patients, including a reduction in the duration and severity of minor conditions, improved adherence to treatment, higher patient satisfaction, and lower psychological distress[3-6]. In professionals themselves, experimental research from social neuroscience has confirmed the long-standing clinical assumption that difficulty maintaining an adequate emotional distance from the suffering of patients could lead to emotional exhaustion, the latter being a core component of burnout[7]. Research has also shown that sharing emotions without regulating effectively one's emotions could lead to a reduced empathy[8]. Abilities to regulate one's emotions and empathy are all the more important in the context of serious paediatric conditions where professionals are even more likely to develop burnout and exhaustion[9-13].

Emotional competencies are particularly important in a context where being empathetic could have an emotional cost to professional caregivers[14]. To avoid emotional confusion, it is essential that professionals distinguish between their own emotions and their patient's emotions[15]. This is based on an adequate identification of one's own emotions and the emotions of others (i.e., identifying the agent of the emotional experience)[16]. An important skill allowing adequate identification of the source of emotion is to accept emotions as they arise rather than trying to avoid or

1  
2  
3 suppress them. In this context, three key emotional competencies have been identified as  
4  
5 core to empathic processes: 1) identifying one's own emotions, 2) identifying the  
6  
7 emotions in others, and 3) accepting one's own emotions.  
8  
9

10 Mindfulness-based interventions, including Mindfulness-Based Stress Reduction  
11 (MBSR), are deemed to promote a better awareness and acceptance of emotions as they  
12 occur and therefore could help develop emotional competencies in professional  
13 caregivers[17]. However, despite the importance of empathy in healthcare and the  
14 suggested capacity of mindfulness practice to increase empathy and its related emotional  
15 competencies, these have seldom been selected as primary or secondary outcomes in  
16 previous studies[18]. We conducted two interrelated studies to test for the effect of  
17 mindfulness on these outcomes in a population of professionals vulnerable to burnout.  
18  
19  
20  
21  
22  
23  
24  
25  
26  
27  
28

29 The first objective of the studies was to determine if an MBSR-derived program  
30 was a feasible and acceptable intervention for students and professional caregivers  
31 working in a tertiary paediatric haematology-oncology treatment centre. The second  
32 objective was to determine if the program could achieve a significant clinical signal on  
33 empathy and the following emotional competencies: identification of one's own  
34 emotions, identification of others' emotions, and emotional acceptance.  
35  
36  
37  
38  
39  
40  
41  
42  
43  
44  
45

## 46 **METHODS**

### 47 **Design**

48  
49 As recommended in existing program development methodological guidelines  
50 when examining new outcomes of a manualized intervention, we performed two Phase  
51  
52  
53  
54  
55  
56  
57  
58  
59  
60  
Ila Proof-of-concept studies focusing on feasibility and clinical signals on the new

1  
2  
3 domains in an original population[19]. The first study was used to set up the program and  
4 the modalities for data collection in a student population; the second was designed to  
5 replicate the first in a professional setting, to extend it to a larger scale, and to include a  
6 follow-up. Both studies were designed as one-group pretest-posttest studies to inform  
7 future trials. Measures were taken at pre and post for Study 1 and at pre, post, and a 3-  
8 month follow-up for Study 2.  
9  
10  
11  
12  
13  
14  
15  
16

### 17 **Participants and procedure**

18  
19 Study 1 took place between October 2015 and March 2016 at the University of  
20 Montreal and involved university psychology students. Study 2 took place at the CHU  
21 Sainte-Justine Department of Hematology-Oncology (Montreal, Canada) from March to  
22 May 2016 and involved professional caregivers working in paediatric haematology-  
23 oncology. Inclusion criteria for both studies were a) the ability to comply with the  
24 requirements of the program, b) no previous participation in MBSR, c) no active  
25 substance dependence, d) no psychotic symptoms, and e) no suicidality.  
26  
27  
28  
29  
30  
31  
32  
33  
34  
35

#### 36 Study 1

37  
38 Participants were recruited at the University of Montreal Psychology Department.  
39 All psychology undergraduate and graduate students ( $n = 1,130$ ) were approached by  
40 email to participate in this 8-week stress reduction program.  
41  
42  
43  
44  
45

#### 46 Study 2

47  
48 Participants of Study 2 were recruited among day shift professional caregivers  
49 and employees working at the CHU Sainte-Justine Department of Hematology-Oncology  
50 ( $n = 109$ ). Potential participants were invited to an information meeting. The instructor  
51 (ML) met participants who were interested individually.  
52  
53  
54  
55  
56  
57  
58  
59  
60



1  
2  
3 Participants gave written informed consent before the beginning of the study.  
4  
5 They received \$50 (CAD) for the completion of the program and the surveys. The study  
6  
7 received full approval from the Research Ethics Committees of the University of  
8  
9 Montreal's Faculty of Arts and Sciences and the CHU Sainte-Justine (#2016-1068).  
10  
11

## 12 13 14 15 **Intervention**

16  
17 The PEACE Program (French acronym for *Pleine conscience, Empathie,*  
18  
19 *Acceptation et Compétences Émotionnelles*) was modelled on the Mindfulness-Based  
20  
21 Stress Reduction (MBSR) developed by Jon Kabat-Zinn[17] which had already been  
22  
23 tested in paediatric haematology-oncology (but with other outcomes)[20]. The  
24  
25 intervention consisted of eight weekly 2-hour sessions and a full-day silent retreat  
26  
27 between session 6 and 7. Participants received a workbook and audio recordings of  
28  
29 guided meditations to help them with home practice. The intervention was led by an  
30  
31 instructor with extended meditation practice and training in MBSR at the University of  
32  
33 Massachusetts Medical School (ML). To ensure the integrity of the program, the  
34  
35 instructor was supervised by a certified MBSR instructor, a pioneer in the field with more  
36  
37 than a decade of experience teaching MBSR to caregivers in Canada and Europe (PD, see  
38  
39 acknowledgments). All sessions were videotaped for that purpose.  
40  
41  
42  
43  
44  
45  
46  
47

## 48 49 **Feasibility and acceptability**

50  
51 We assessed the feasibility of conducting an 8-week mindfulness-based program  
52  
53 with professionals working in paediatric haematology-oncology by evaluating their  
54  
55 interest in the program, the retention rates, and adherence to practice. The interest in the  
56  
57  
58  
59  
60

1  
2  
3 program was measured by the proportion of professionals interested among those  
4  
5 meeting the eligibility criteria. The retention rate was measured by the proportion of  
6  
7 professionals enrolled in the study who completed the study protocol (at least six of the  
8  
9 eight weekly sessions). The adherence to practice was estimated by the number of hours  
10  
11 of home practice as recorded by the participants, including formal practice (i.e. yoga,  
12  
13 meditation, body scan, walking meditation) and informal practice (e.g., being mindful  
14  
15 while performing daily tasks such as brushing one's teeth).  
16  
17  
18

19  
20 We also included three open-ended evaluation questions in the post-study  
21  
22 questionnaire to explore the acceptability of the program: (1) "What is your general  
23  
24 appreciation of the program?", (2) "What are the obstacles you have encountered during  
25  
26 the program?", and (3) "What did you learn from your participation in the program?" In  
27  
28 addition, in the pre-study questionnaire, participants were asked to set three personal  
29  
30 goals for the program. In the post-study questionnaire, they were asked whether the  
31  
32 program had helped them achieve these goals.  
33  
34  
35  
36  
37  
38

### 39 **Measures**

40  
41 At all time points, participants completed validated French-language versions of  
42  
43 self-report questionnaires electronically via SurveyMonkey®. They also completed an  
44  
45 emotion recognition task[21] online via the survey tool of the Qualtrics Research Suite  
46  
47 (Copyright © 2016 Qualtrics, Provo, UT, USA).  
48  
49  
50  
51  
52  
53  
54  
55  
56  
57  
58  
59  
60

## Mindfulness

The Mindful Attention Awareness Scale (MAAS)[22] was used to measure mindfulness. The MAAS is a validated 15-item questionnaire that measures attention to and awareness of the present moment on a 6-point Likert scale (1 = almost always; 6 = almost never)[22, 23]. The total score is the mean of the items (range 1–6). An example of an item is: “I do jobs or tasks automatically, without being aware of what I'm doing”. The internal consistency coefficient for both Study 1 and Study 2 was  $\alpha = .84$ .

## Empathy

Empathy was measured with the Interpersonal Reactivity Index (IRI)[24], a 28-item answered on a 5-point Likert scale (0=does not describe me well, 4=describes me very well). Two subscales of the IRI were used for this study (7 items each): the Perspective Taking (PT) subscale, which measures the tendency to adopt others' viewpoints (cognitive empathy); and the Empathic Concern (EC) subscale, which measures the tendency to feel warmth, concern, and compassion for others (emotional empathy). The score of each subscale is the sum of the items (range 0–28). An example of a PT item is: “When I'm upset at someone, I usually try to ‘put myself in his shoes’ for a while”. An example of an EC item is: “I often have tender, concerned feelings for people less fortunate than me”. In Study 1, the Cronbach alphas were .67 for PT and .75 for EC; in Study 2, the Cronbach alphas were .75 for PT and .73 for EC.

## Emotional Competencies

*Identification of one's own emotions.* Identification of one's own emotions was measured with the Profile of Emotional Competence (PEC)[25], which measures

1  
2  
3 emotional competencies on a 5-point Likert scale (1 = not at all/never; 5 = very  
4 well/often). We used the 5-item subscale 'Identify my Emotions'. The score of the  
5  
6 subscale is the mean of the items (range 1–5). An example of the items include: "I am  
7  
8 aware of my emotions as soon as they arise". The subscale's Cronbach alphas for Study 1  
9  
10 and Study 2 were .81 and .54, respectively.

11  
12  
13  
14  
15 *Identification of emotions in others.* Identification of emotions in others was  
16  
17 measured with the PEC's 5-item subscale 'Identify Others' Emotions'[25]. The score of  
18  
19 the subscale is the mean of the items (range 1–5). "I am good at sensing what others are  
20  
21 feeling" ('Identify Others' Emotions'). The subscale's Cronbach alphas for Study 1 and  
22  
23 Study 2 were .84 and .67, respectively.

24  
25  
26  
27 *Emotional acceptance.* Emotional acceptance was measured with the Acceptance  
28  
29 & Action Questionnaire-II (AAQ-II), a 10-item questionnaire using a 7-point Likert scale  
30  
31 (1 = never true, 7 = always true)[26]. The scale measures experiential avoidance; items  
32  
33 were reversed to obtain a measure of acceptance. The score of the scale is the sum of the  
34  
35 items (range 10–70). An example of an item is: "I'm afraid of my feelings". The  
36  
37 Cronbach alphas for Study 1 and Study 2 were .91 and .79, respectively.

38  
39  
40  
41 We also used the Emotion Regulation Scale (ERQ)[27], a 7-item questionnaire  
42  
43 using a 7-point Likert scale (1=strongly agree, 7=strongly disagree) to assess the  
44  
45 suppression of emotions (4-item Expressive Suppression subscale), reflecting less  
46  
47 emotional acceptance[28]. The score of the 4-item subscale is the mean of the items  
48  
49 (range 1–7). An example of an item is: "I control my emotions by not expressing them".  
50  
51 The subscale's Cronbach alphas for Study 1 and Study 2 were .67 and .84, respectively.  
52  
53  
54  
55  
56  
57  
58  
59  
60

## Recognition of others' emotions task

The Geneva Emotion Recognition Test (GERT)[21] was used to measure the participants' ability to recognize emotions in others. This is a facial emotional recognition task consisting of 83 short videos (with audio recordings) in which actors express 14 different emotions. The task can be completed in approximately 20 minutes (10 minutes for the short version). After each video, participants had to choose which emotion was expressed by the actor on the video[29]. The full 83-item GERT was used for Study 1 and due to time concerns the short 42-item version (GERT-S) was used for Study 2. The score is the sum of the items (range 0–83 for the GERT and 0–42 for the GERT-S).

## Statistical analysis

Descriptive statistics were used to describe socio-demographic characteristics of the samples. For Study 1, we performed Student's *t*-tests to compare pre/post differences. For Study 2, we performed General Linear Models (GLM) with three levels (pre, post, follow-up) that included a Mauchly's Test of Sphericity. A Greenhouse-Geisser correction was used when the assumption of sphericity was violated. Pairwise comparisons were performed with a Bonferroni correction for multiple comparisons. Statistical significance was established at  $p < .05$ . In line with our objectives, we computed Cohen's *d* to assess effect sizes for pre/post, post/follow-up, and pre/follow-up differences. Statistical analyses were performed with IBM SPSS Statistics, version 24.0 (IBM Corp., Armonk, N.Y., USA).

## RESULTS

### Participants

Participants' demographic characteristics for both studies are shown in Table 1. The mean (*SD*) number of hours of formal practice at home for the entire program was on average 9.8 (6.2) for Study 1 and 24.9 (12.9) for Study 2. Hours of informal practice were on average 2.5 (1.8) for Study 1 and 11.4 (15.3) for Study 2.

Table 1  
 Characteristics of Participants

|                                                           | Study 1<br>(Students, $n = 12$ )<br>$n$ (%) / $M$ ( $SD$ ) | Study 2<br>(Professionals, $n = 25$ )<br>$n$ (%) / $M$ ( $SD$ ) |
|-----------------------------------------------------------|------------------------------------------------------------|-----------------------------------------------------------------|
| Sex                                                       |                                                            |                                                                 |
| Female                                                    | 11 (92%)                                                   | 22 (88%)                                                        |
| Male                                                      | 1                                                          | 3                                                               |
| Age                                                       | 24.0 (4.2) range 18–34                                     | 48.1 (10.8) range 27–63                                         |
| Marital status                                            |                                                            |                                                                 |
| Married, civil union, common-law                          | 5 (42%)                                                    | 12 (48%)                                                        |
| Living alone                                              | 7 (58%)                                                    | 13 (52%)                                                        |
| University Level (Study 1) / Level of Education (Study 2) |                                                            |                                                                 |
| College                                                   | -                                                          | 3 (12%)                                                         |
| Bachelor                                                  | 7 (58%)                                                    | 12 (48%)                                                        |
| Master                                                    | -                                                          | 6 (24%)                                                         |
| Doctorate                                                 | 5 (42%)                                                    | 4 (16%)                                                         |
| Profession (Study 2)                                      |                                                            |                                                                 |
| Nurse                                                     | -                                                          | 13 (52%)                                                        |
| Physician                                                 | -                                                          | 2 (8%)                                                          |
| Professionals <sup>a</sup>                                | -                                                          | 4 (16%)                                                         |
| Support Staff <sup>b</sup>                                | -                                                          | 6 (24%)                                                         |

<sup>a</sup> 2 Physiotherapists and 2 Supportive Care Professionals

<sup>b</sup> 4 Research Staff and 2 Community Organization Professionals

## Feasibility and Acceptability

### Study 1

Forty-three students showed interest in participating in the study. Sixteen were interviewed and screened for eligibility, with 15 recruited to take part in the study. Among these, 12/15 completed at least 6 sessions, yielding a retention rate of 80%. Furthermore, 15/15 (100%) completed the pre-intervention survey, 12/15 (80%) completed the post-survey, and 11/12 (92%) attended the one-day silent retreat. Three students (20%) left the program (two after the first

1  
2  
3 session for personal reasons and one after the fourth session due to a scheduling conflict). The  
4  
5 final sample for analyses was thus composed of 12 students.  
6  
7

8 Post-intervention data indicated high levels of satisfaction with the PEACE Program.  
9  
10 Thus, 11/12 (92%) reported that the program had helped them achieve the goals they had set for  
11  
12 themselves and 12/12 (100%) reported that the program made them more aware of their  
13  
14 experience of the present moment. Participants reported that the program was (a) “varied”, b)  
15  
16 “structured”, (c) “instructive”, and (d) “beneficial”. Participants’ comments were positive  
17  
18 regarding their overall appreciation of the program (e.g., “I did it to sleep better and it worked”,  
19  
20 “This program helped me improve my stress management skills and I want to continue  
21  
22 meditating”). Students reported that they had learned from the program (e.g., “I learned that it’s  
23  
24 very important to take time for myself”). The most frequent obstacles reported by the students  
25  
26 were as follows: (a) “the length of the daily home practice”, (b) “lack of assiduity”, (c)  
27  
28 “difficulty finding time for home practice”, (d) “motivation for home practice”, and (e)  
29  
30 “sleepiness during the exercises”.  
31  
32  
33  
34  
35

### 36 Study 2

37  
38 Forty-one out of 109 (38 %) eligible employees showed interest in participating in the  
39  
40 study. Among these, 28/41 (68%) were enrolled in the study; 13/41 (32%) could not participate  
41  
42 due to scheduling conflicts or personal reasons. However, 2/28 (7%) left before the beginning of  
43  
44 the program because of scheduling difficulties. Twenty-six employees were therefore eventually  
45  
46 enrolled in the program. Although one participant (4%) abandoned the program after two  
47  
48 sessions due to a scheduling conflict, 21/26 participants completed at least six sessions, leading  
49  
50 to a retention rate of 81%. Furthermore, 19/26 (73 %) attended the one-day silent retreat, 26/26  
51  
52  
53  
54  
55  
56  
57  
58  
59  
60



1  
2  
3 (100%) completed the pre-intervention survey, 25/26 (96%) completed the post-intervention  
4  
5 survey, and 24/26 (92%) completed the follow-up survey.  
6  
7

8 All employees (100%) who completed the study reported that the program had helped  
9  
10 them achieve the goals they had set for themselves and had made them more aware of their  
11  
12 experience. Participants reported that the program was (a) “excellent”, (b) “interesting”, and (c)  
13  
14 “a very good initiative”. Participants’ comments were positive regarding their overall  
15  
16 appreciation of the program (e.g., “I would recommend it to others”). They reported that they  
17  
18 had learned many things from their participation in the program (e.g., “The importance of living  
19  
20 the present moment and to put oneself in the shoes of the other in the caregiver-patient  
21  
22 relationship”). Obstacles reported by the participants included (a) “lack of time for home  
23  
24 practice”, (b) “lack of time to participate in the 8 weekly sessions”, and (c) “lack of self-  
25  
26 discipline”.  
27  
28  
29  
30  
31  
32  
33

### 34 **Outcome results**

35  
36 A preliminary analysis checked that the program was actually related to changes on the  
37  
38 mindfulness measure. Results showed very large effect sizes pre-post in Study 1,  $d = 1.53$ ;  
39  
40  $t(11)=5.29, p < .001$  and Study 2  $d = 1.72, p < .001$  (Fig. 1). Changes were also maintained at  
41  
42 follow-up in Study 2,  $d = 1.54, p < .001$ . In Study 2, a repeated measures ANOVA showed  
43  
44 differences in scores over the three time points,  $F(1.43, 32.90) = 35.72, p < .001, \eta_p^2 = .61$ . When  
45  
46 exploring the size of changes associated with the program, we observed large effect sizes on  
47  
48 several pertinent outcomes (Fig. 1).  
49  
50  
51  
52  
53  
54  
55  
56  
57  
58  
59  
60

## Study 1

For Study 1 pre/post comparisons, very large effect sizes were observed for the following: Acceptance,  $d = 1.39$ ;  $t(11) = 4.81$ ,  $p < .001$ ; the Emotion Recognition Task,  $d = 1.20$ ;  $t(11) = 4.14$ ,  $p < .01$ ; and Perspective Taking ( $d = 1.00$ ;  $t(11) = 3.46$ ,  $p < .01$  (Fig. 1). A medium-to-large effect size was observed for Identify my Emotions ( $d = .77$ ;  $t(11) = 2.67$ ,  $p < .05$ ; and Expressive Suppression,  $d = .73$ ;  $t(11) = 2.53$ ,  $p < .05$  (Fig. 1). Empathic Concern and Identify Others' Emotions showed a small-medium effect size but did not reach statistical significance ( $d = .49$ ;  $t(11) = 1.70$ ,  $p = .118$  and  $d = .31$ ,  $t(11) = 1.09$ ,  $p = .301$  respectively). Table 2 includes full detailed results.

Table 2  
 Study 1 and Study 2 Outcomes Scores at Different Time/-Points

| Measure                                     | Study 1 (Students, N = 12) |           |          |           | Study 2 (Professionals, N = 25) |           |          |           |           |           |
|---------------------------------------------|----------------------------|-----------|----------|-----------|---------------------------------|-----------|----------|-----------|-----------|-----------|
|                                             | Pre                        |           | Post     |           | PRE                             |           | POST     |           | FOLLOW-UP |           |
|                                             | <i>M</i>                   | <i>SD</i> | <i>M</i> | <i>SD</i> | <i>M</i>                        | <i>SD</i> | <i>M</i> | <i>SD</i> | <i>M</i>  | <i>SD</i> |
| Mindfulness (MAAS)                          | 2.76                       | .56       | 3.43     | .73       | 2.89                            | .52       | 3.79     | .53       | 3.61      | .41       |
| Perspective Taking (IRI)                    | 2.58                       | .52       | 3.05     | .47       | 2.63                            | .67       | 2.94     | .56       | 2.77      | .55       |
| Empathic Concern (IRI)                      | 2.79                       | .31       | 3.00     | .29       | 2.96                            | .63       | 2.98     | .44       | 2.97      | .56       |
| Identify my Emotions (PEC)                  | 3.07                       | .88       | 3.53     | .97       | 3.47                            | .64       | 4.0      | .54       | 4.01      | .57       |
| Identify Others' Emotions (PEC)             | 3.97                       | .69       | 4.17     | .61       | 3.86                            | .60       | 3.99     | .50       | 3.95      | .59       |
| Acceptance (AAQ-II)                         | 42.25                      | 10.83     | 48.83    | 9.61      | 44.08                           | 7.85      | 51.54    | 8.21      | 51.88     | 8.42      |
| Expressive Suppression (ERQ)                | 2.75                       | .81       | 2.44     | .94       | 3.18                            | 1.09      | 2.68     | 1.15      | 2.74      | 1.09      |
| Recognition of Emotions (GERT) <sup>a</sup> | 58.58                      | 4.01      | 63.83    | 6.16      | 26.75                           | 5.89      | 29.00    | 4.00      | 29.00     | 5.72      |

MAAS = Mindfulness Attention & Awareness Scale; IRI = Interpersonal Reactivity Index; PEC = Profile of Emotional Competence; AAQ-II = Acceptance & Action Questionnaire; ERQ = Emotion Regulation Questionnaire; GERT = Geneva Emotion Recognition Recognition Test. <sup>a</sup>The 83-item original version of the GERT was used for Study 1 and the 42-item short version (GERT-S) was used for Study 2

## Study 2

The repeated measures ANOVA showed differences in scores over the three time points. These involved the following: Perspective Taking,  $F(1.58, 36.40) = 5.83, p < .01, \eta_p^2 = .20$ ; Identify my Emotions,  $F(2, 46) = 16.64, p < .001, \eta_p^2 = .42$ ; Acceptance,  $F(2, 46) = 25.78, p < .001, \eta_p^2 = .53$  and Expressive Suppression,  $F(2, 46) = 4.39, p < .01, \eta_p^2 = .16$  (Fig 1). We did not find significant differences on Empathic Concern  $F(2, 46) = .023, p = .977, \eta_p^2 = .001$ ; Identify Others' Emotions  $F(2, 46) = 1.116, p = .336, \eta_p^2 = .046$  and the Emotion Recognition Task  $F(2, 46) = 2.91, p = .07, \eta_p^2 = .16$  (Table 2).

Posthoc pairwise comparisons revealed Pre/Post improvements with large effect sizes for Acceptance ( $d = .93$ ) and Identify my Emotions ( $d = .90$ ). A medium effect size was observed for Pre/post differences in Perspective Taking ( $d = .50$ ) and Expressive Suppression ( $d = .45$ ). A medium effect size was also observed on the Emotion Recognition Task ( $d = .45$ ) but that difference was not statistically significant. A small effect size was observed for the Pre/post difference on Identify Others' Emotions ( $d = .24$ ) but the difference was not statistically significant. No effect was noted on Empathic Concern ( $d = .04$ ; Table S1). In study II, we found that effects associated with the program were maintained over 3 months on the following outcomes: Identify my Emotions, Acceptance, Expressive Suppression, and the Emotion Recognition Task (Fig. 1).

When exploring the role of home practice, we did not find correlations between formal practice with changes on outcome measured in Study 1. In Study 2, formal practice (yoga, sitting meditation, and body scan) was moderately correlated with improvements on Identify my Emotions,  $r = .42; p < .05$  and Expressive Suppression,  $r =$

1  
2  
3  
4  
5  
6  
7  
8  
9  
10  
11  
12  
13  
14  
15  
16  
17  
18  
19  
20  
21  
22  
23  
24  
25  
26  
27  
28  
29  
30  
31  
32  
33  
34  
35  
36  
37  
38  
39  
40  
41  
42  
43  
44  
45  
46  
47  
48  
49  
50  
51  
52  
53  
54  
55  
56  
57  
58  
59  
60

–.52,  $p < .01$ , but did not correlate with other outcomes. Informal practice did not correlate with other outcome changes over time.

## DISCUSSION

These two studies are the first to specifically examine the effects of a mindfulness-based program on students' and professional caregivers' emotional competencies. We found that the MBSR-based program is a feasible and acceptable intervention and that it could achieve an important clinical signal across different emotional measures, particularly in a vulnerable population, namely professional caregivers working in paediatric haematology-oncology.

Participants in this program showed improvements in their mindfulness skills, with effect sizes larger than those found in previous studies using the same measure with professionals in training [30-33] and larger than those reported in studies using other mindfulness scales with healthcare professionals [34-36]. Participants also improved on the identification of one's own emotions, with effect sizes larger than those found in other studies [35, 37]. During the program, participants were specifically instructed to attend to their own physical sensations, which allowed them to be more aware of their emotions. Of note, the more professionals practised the formal meditation exercises at home during the program, the more they reported post-intervention improvements on this specific emotional competency (Study 2). Moreover, these improvements were maintained at 3 months post-intervention in Study 2, which suggests that the intervention could have lasting effects.

1  
2  
3  
4  
5  
6  
7  
8  
9  
10  
11  
12  
13  
14  
15  
16  
17  
18  
19  
20  
21  
22  
23  
24  
25  
26  
27  
28  
29  
30  
31  
32  
33  
34  
35  
36  
37  
38  
39  
40  
41  
42  
43  
44  
45  
46  
47

There was no significant improvement in the self-reported ability to identify others' emotions. This unexpected result could be due to the fact that participants' pre study scores were already high on this outcome. In both our studies, participants had higher pre study scores on this outcome than the norms reported by the authors of the scale[25], whereas they had lower scores than the norms on the identification of one's own emotions. This could be because all formal meditation exercises focused on being attentive to one's own internal experiences. Perhaps more specific interventions focusing on interpersonal awareness, such as narrative medicine, could be included in the program to teach participants how to attend to others' emotions[34]. In healthcare, correct identification of emotions in patients is crucial for effective communication, good care planning, and patient safety outcomes[38, 39]. Although some of the exercises practised at the weekly meetings were performed in dyads and incorporated mindful communication, this apparently did not spread to the relation to others' emotions, as measured with self-report. This contrasts with results from the emotion recognition task (GERT), a more ecological measure, which allows for a direct measure of participants' ability to recognize a large range of emotions. Interestingly, participants in Study 1 improved significantly on this task with a very large effect size, while the improvement for professionals was not significant. Nevertheless, the latter showed a medium effect size.

48  
49  
50  
51  
52  
53  
54  
55  
56  
57  
58  
59  
60

Participants also showed improvements in emotional acceptance and these results were maintained at 3 months post-intervention in Study 2. These results are in line with previous research, which indirectly measured this competence [35, 37, 40, 41]. Mindfulness focuses on the acceptance of one's own experience in the present moment,

1  
2  
3 whether experienced as positive or negative, without judgment, and with an attitude of  
4 openness[17, 42, 43]. Instead of trying to avoid or distract themselves from so-called  
5  
6 negative emotions, participants here were invited to welcome and pay attention to  
7  
8 whatever thoughts and emotions arose in their field of consciousness from moment to  
9  
10 moment. It is essential that professional caregivers learn how to accept their emotions  
11  
12 instead of avoiding or suppressing them. Previous studies have indeed demonstrated that  
13  
14 acceptance was linked to fewer psychological symptoms such as anxiety and  
15  
16 depression[44-46].  
17  
18  
19  
20  
21

22  
23 Furthermore, participants improved in perspective taking. These results are  
24  
25 consistent with those of Krasner et al. (2009), who reported an increased ability for  
26  
27 perspective taking following an 8-week MBSR-based program amongst primary care  
28  
29 physicians using the Jefferson Scale of Physician Empathy (JSPE)[34]. This study  
30  
31 reported a small-to-medium effect size, similar to the effect size found in our second  
32  
33 study with professional caregivers. Different pathways might explain improvements in  
34  
35 perspective taking in our studies. Firstly, a concurrent improvement in emotional  
36  
37 competencies might help caregivers adopt their patients' point of views. To explore this  
38  
39 hypothesis, we performed additional analyses correlating the emotional competencies  
40  
41 with perspective taking. Interestingly, change in perspective taking were correlated with  
42  
43 change in the PEC total score, which encompasses interpersonal and intrapersonal  
44  
45 emotional competencies (Study 1;  $r = .67$ ;  $p < .01$ ; Study 2:  $r = .38$ ;  $p = .059$ ). Secondly, it  
46  
47 has been suggested that keeping an *emotional distance* is advisable in patient care in  
48  
49 order to maintain professionals' emotional balance[47]. Perhaps the emotional  
50  
51 competencies measured in this study fostered such a distance. Alternatively, they may  
52  
53  
54  
55  
56  
57  
58  
59  
60

1  
2  
3 prevent professional caregivers from confounding their personal experience with that of  
4 the patient. A recent study suggests that concentrating too highly on personal emotions is  
5 associated with decreased ability to detect distress in persons affected by cancer[48].  
6  
7  
8  
9  
10 Future studies should explore more systematically the mechanisms underlying the effects  
11 of emotional competencies on perspective taking. Participants did not improve on  
12 empathic concern. Although this result may appear surprising, it is consistent with the  
13 cognitive effect expected from mindfulness training. This result is also in line with  
14 previous results on healthcare providers, which found no significant change on the IRI's  
15 empathic concern[49, 50]. Perhaps mindfulness does not affect empathic concern: a study  
16 found that mindfulness increases perspective taking, but not empathic concern[51].  
17  
18  
19  
20  
21  
22  
23  
24  
25  
26  
27  
28  
29  
30  
31  
32  
33  
34  
35  
36  
37  
38  
39  
40  
41  
42  
43  
44  
45  
46  
47  
48  
49  
50  
51  
52  
53  
54  
55  
56  
57  
58  
59  
60

Future research should disentangle cognitive and affective aspects of empathy as they seem differently impacted by mindfulness and have been shown to interact when explaining burnout[52].

We should acknowledge certain limitations to our studies. Firstly, participants were self-selected and sample sizes were limited. However, self-selection is relatively ecological as it is a reflection of what would happen if the program were offered. Importantly, a large sample selected at random is not necessary at the proof-of-concept stage[19]. The results of our studies justify progressing toward more rigorous testing with larger samples in randomized controlled trials. Another limitation lies with the use of self-reports as they bear desirability. Future studies should include more tasks like the one used in this study to approach emotional competence before and after training. A final limitation is the low reliability of the 'Identify my Emotions' subscale in Study 2.



1  
2  
3  
4  
5  
6  
7  
8  
9  
10  
11  
12  
13  
14  
15  
16  
17  
18  
19  
20  
21  
22  
23  
24  
25  
26  
27  
28  
29  
30  
31  
32  
33  
34  
35  
36  
37  
38  
39  
40  
41  
42  
43  
44  
45  
46  
47  
48  
49  
50  
51  
52  
53  
54  
55  
56  
57  
58  
59  
60

Notwithstanding these limitations, an important strength of this research is the replication of results between Study 1 and Study 2 on very different populations. Another strength is the high attendance rates (80% and 81%, respectively), which could be explained by the fact that potential participants were well informed about the nature and the structure of the PEACE program, as well as the required level of commitment before enrolling. For example, professional caregivers were given the chance to attend an information session where they could try a brief meditation session and ask questions about the program before participating in the study. The instructor also met each participant individually prior to starting the training, in order to evaluate their willingness and readiness to engage in the program.

In conclusion, the results of these two proof-of-concept studies suggest that MBSR could improve professional caregivers' perspective taking skills (the cognitive dimension of empathy), but maybe not their empathic concern (the affective dimension of empathy). MBSR could also improve professionals' emotional competencies, such as identifying and accepting one's own emotions, which could contribute to the prevention of burnout. Furthermore, this research could have interesting applications in the training and continuing education of professionals in the helping professions.

## ACKNOWLEDGEMENTS

The authors wish to acknowledge the students and professionals who participated in the PEACE Programme. We also acknowledge Dr. Patricia Dobkin for her very helpful advice and supervision. We are grateful to Marie-Claude Charrette for her help in the recruitment process. We thank Marie-Pier Bilodeau for her work in collecting the

1  
2  
3 data, and Emilie Rondeau for her work through all the stages of the study. Finally,  
4  
5 particular thanks to Lucie Gouveia and Sarah Bérubé for their suggestions in the writing  
6  
7 of the manuscript.  
8  
9

### 10 11 12 **COMPETING INTERESTS**

13  
14  
15 We have read and understood BMJ policy on declaration of interests and declare  
16  
17 that we have no competing interests.  
18  
19

### 20 21 22 **DATA SHARING STATEMENT**

23  
24 Statistical Code and dataset are available on demand.  
25  
26

### 27 28 29 **FUNDING**

30  
31 This research was supported by the CHU Sainte-Justine Foundation. ML was  
32  
33 supported by Grant No. GSM 136461 from the Canadian Institutes of Health Research  
34  
35 (CIHR)—Canada Graduate Scholarships-Master’s Programme and Grant No. 32083 from  
36  
37 the Fond de recherche du Québec-Santé (FRQS)—Doctoral training.  
38  
39  
40  
41  
42

### 43 44 **AUTHORS’ CONTRIBUTIONS**

45  
46 ML participated in the design of the study, coordinated the study, performed the  
47  
48 statistical analysis, and wrote the manuscript. MD helped design the study and participant  
49  
50 recruitment, and revised the manuscript. PM provided advice for the statistical analysis.  
51  
52 YP revised the manuscript. SS participated in the design of the study and the coordination  
53  
54  
55  
56  
57  
58  
59  
60

1  
2  
3 of the study, found financial support, and coordinated the writing of the manuscript. All  
4  
5 authors read and approved the final manuscript.  
6  
7  
8  
9

## 10 REFERENCES

- 11 1. Hojat M. Empathy in patient care : antecedents, development, measurement, and  
12 outcomes. New York, NY: Springer 2007.  
13  
14
- 15 2. Davis MH. Empathy : a social psychological approach. Madison, Wis.: Brown &  
16 Benchmark Publishers 1994.  
17  
18
- 19 3. Hojat M, Louis DZ, Markham FW, et al. Physicians' empathy and clinical outcomes  
20 for diabetic patients. *Acad Med* 2011;86(3):359–64.  
21  
22
- 23 4. Rakel D, Barrett B, Zhang Z, Hoelt T, et al. Perception of empathy in the therapeutic  
24 encounter: effects on the common cold. *Patient Educ Couns* 2011;85(3):390–7.  
25  
26
- 27 5. Lelorain S, Bredart A, Dolbeault S, et al. A systematic review of the associations  
28 between empathy measures and patient outcomes in cancer care. *Psychooncology*  
29 2012;21(12):1255–64.  
30  
31
- 32 6. Blatt B, LeLacheur SF, Galinsky AD, et al. Does perspective-taking increase patient  
33 satisfaction in medical encounters? *Acad Med* 2010;85(9):1445–52.  
34  
35
- 36 7. Decety J, Yang CY, Cheng Y. Physicians down-regulate their pain empathy response:  
37 an event-related brain potential study. *Neuroimage* 2010;50(4):1676–82.  
38  
39
- 40 8. Decety J, Lamm C. Empathy versus personal distress - recent evidence from social  
41 neuroscience. *The Social Neuroscience of Empathy*. Cambridge, MA: MIT Press 2009.  
42  
43
- 44 9. Altounji D, Morgan H, Grover M, et al. A self-care retreat for pediatric hematology  
45 oncology nurses. *J Pediatr Oncol Nurs* 2013;30(1):18–23.  
46  
47  
48  
49  
50  
51  
52  
53  
54  
55  
56  
57  
58  
59  
60

- 1  
2  
3  
4  
5  
6  
7  
8  
9  
10  
11  
12  
13  
14  
15  
16  
17  
18  
19  
20  
21  
22  
23  
24  
25  
26  
27  
28  
29  
30  
31  
32  
33  
34  
35  
36  
37  
38  
39  
40  
41  
42  
43  
44  
45  
46  
47  
48  
49  
50  
51  
52  
53  
54  
55  
56  
57  
58  
59  
60
10. Mukherjee S, Beresford B, Glaser A, et al. Burnout, psychiatric morbidity, and work-related sources of stress in paediatric oncology staff: a review of the literature. *Psychooncology* 2009;18(10):1019–28.
11. Roth M, Morrone K, Moody K, et al. Career burnout among pediatric oncologists. *Pediatr Blood Cancer* 2011;57(7):1168–73.
12. Liakopoulou M, Panaretaki I, Papadakis V, et al. Burnout, staff support, and coping in Pediatric Oncology. *Support Care Cancer* 2008;16(2):143–50.
13. Bowden MJ, Mukherjee S, Williams LK, et al. Work-related stress and reward: an Australian study of multidisciplinary pediatric oncology healthcare providers. *Psychooncology* 2015;24(11):1432–8.
14. Gleichgerrcht E, Decety J. The Costs of Empathy among Health Professionals. In: Decety, J, ed. *Empathy: from Bench to Bedside*. London, England: The MIT Press 2012:245–261.
15. Decety J, Meyer M. From emotion resonance to empathic understanding: a social developmental neuroscience account. *Dev Psychopathol* 2008;20(4):1053–80.
16. Decety J. The neurodevelopment of empathy in humans. *Dev Neurosci* 2010;32(4):257–67.
17. Kabat-Zinn J. *Full catastrophe living : using the wisdom of your body and mind to face stress, pain, and illness*. Revised and updated edition. New York, NY: Bantam Books trade paperback 2013.
18. Lamothe M, Rondeau E, Malboeuf-Hurtubise C, et al. Outcomes of MBSR or MBSR-based interventions in health care providers: A systematic review with a focus on empathy and emotional competencies. *Complement Ther Med* 2016;24:19–28.

- 1  
2  
3  
4 19. Czajkowski SM, Powell LH, Adler N, et al. From ideas to efficacy: The ORBIT  
5  
6 model for developing behavioral treatments for chronic diseases. *Health Psychol*  
7  
8 2015;34(10):971–82.  
9  
10 20. Moody K, Kramer D, Santizo RO, et al. Helping the helpers: mindfulness training for  
11  
12 burnout in pediatric oncology-a pilot program. *J Pediatr Oncol Nurs* 2013;30(5):275–84.  
13  
14 21. Schlegel K, Grandjean D, Scherer KR. Introducing the Geneva emotion recognition  
15  
16 test: an example of Rasch-based test development. *Psychol Assess* 2014;26(2):666–72.  
17  
18 22. Brown KW, Ryan RM. The benefits of being present: mindfulness and its role in  
19  
20 psychological well-being. *J Pers Soc Psychol* 2003;84(4):822–48.  
21  
22 23. Jermann F, Billieux J, Laroï F, et al. Mindful Attention Awareness Scale (MAAS):  
23  
24 Psychometric properties of the French translation and exploration of its relations with  
25  
26 emotion regulation strategies. *Psychol Assess* 2009;21(4):506–14.  
27  
28 24. Davis MH. A multidimensional approach to individual differences in empathy. *JSAS*  
29  
30 *Catalog of Selected Documents in Psychology* 1980;10:85.  
31  
32 25. Brasseur S, Gregoire J, Bourdu R, et al. The Profile of Emotional Competence (PEC):  
33  
34 development and validation of a self-reported measure that fits dimensions of emotional  
35  
36 competence theory. *PLoS One* 2013;8(5):e62635.  
37  
38 26. Bond FW, Hayes SC, Baer RA, et al. Preliminary psychometric properties of the  
39  
40 Acceptance and Action Questionnaire-II: a revised measure of psychological inflexibility  
41  
42 and experiential avoidance. *Behav Ther* 2011;42(4):676–88.  
43  
44 27. Gross JJ, John OP. Individual differences in two emotion regulation processes:  
45  
46 implications for affect, relationships, and well-being. *J Pers Soc Psychol*  
47  
48 2003;85(2):348–62.  
49  
50  
51  
52  
53  
54  
55  
56  
57  
58  
59  
60

- 1  
2  
3  
4  
5  
6  
7  
8  
9  
10  
11  
12  
13  
14  
15  
16  
17  
18  
19  
20  
21  
22  
23  
24  
25  
26  
27  
28  
29  
30  
31  
32  
33  
34  
35  
36  
37  
38  
39  
40  
41  
42  
43  
44  
45  
46  
47  
48  
49  
50  
51  
52  
53  
54  
55  
56  
57  
58  
59  
60
28. Cohen S, Kamarck T, Mermelstein R. A global measure of perceived stress. *J Health Soc Behav* 1983;24(4):385–96.
29. Schlegel K, Scherer KR. Introducing a short version of the Geneva Emotion Recognition Test (GERT-S): Psychometric properties and construct validation. *Behav Res Methods* 2016;48(4):1383–92.
30. Newsome S, Waldo M, Gruszka C. Mindfulness Group Work: Preventing Stress and Increasing Self-Compassion Among Helping Professionals in Training. *The Journal for Specialists in Group Work* 2012;37(4):297–311.
31. Gokhan N, Meehan EF, Peters K. The value of mindfulness-based methods in teaching at a clinical field placement. *Psychol Rep* 2010;106(2):455–66.
32. Cohen JS, Miller LJ. Interpersonal Mindfulness Training for Well-Being: A Pilot Study With Psychology Graduate Students. *Teachers College Record* 2009;111(12):2760–74.
33. Shapiro SL, Brown KW. Teaching Self-Care to Caregivers: Effects of Mindfulness-Based Stress Reduction on the Mental Health of Therapists in Training. *Training and Education in Professional Psychology* 2007;1(2):105–15.
34. Krasner MS, Epstein RM, Beckman H, et al. Association of an educational program in mindful communication with burnout, empathy, and attitudes among primary care physicians. *JAMA* 2009;302(12):1284–93.
35. Amutio A, Martinez-Taboada C, Hermosilla D, Delgado LC. Enhancing relaxation states and positive emotions in physicians through a mindfulness training program: A one-year study. *Psychol Health Med* 2015;20(6):720–31.

- 1  
2  
3 36. Brady S, O'Connor N, Burgermeister D. The impact of mindfulness meditation in  
4 promoting a culture of safety on an acute psychiatric unit. *Perspect Psychiatr Care*  
5  
6 2012;48(3):129–37.  
7  
8  
9  
10 37. Manotas M, Segura C, Eraso M, et al. Association of Brief Mindfulness Training With  
11  
12 Reductions in Perceived Stress and Distress in Colombian Health Care Professionals.  
13  
14 *International Journal of Stress Management* 2014;21(2):207–25.  
15  
16  
17 38. Codier E, Codier D. A model for the role of emotional intelligence in patient safety.  
18  
19 *Asia Pac J Oncol Nurs* 2015;2(2):112–7.  
20  
21  
22 39. Codier E, Mueno L, Freitas E. Emotional Intelligence Abilities in Oncology and  
23  
24 Palliative Care. *Journal of Hospice and Palliative Nursing* 2011;13(3):183–8.  
25  
26  
27 40. de Vibe M, Solhaug I, Tyssen R, et al. Mindfulness training for stress management: a  
28  
29 randomised controlled study of medical and psychology students. *BMC Med Educ*  
30  
31 2013;13:107.  
32  
33  
34 41. Asuero AM, Queralto JM, Pujol-Ribera E, et al. Effectiveness of a mindfulness  
35  
36 education program in primary health care professionals: a pragmatic controlled trial. *J*  
37  
38 *Contin Educ Health Prof* 2014;34(1):4–12.  
39  
40  
41 42. Hayes SC, Luoma JB, Bond FW, et al. Acceptance and commitment therapy: model,  
42  
43 processes and outcomes. *Behav Res Ther* 2006;44(1):1–25.  
44  
45  
46 43. Linehan M. Cognitive-behavioral treatment of borderline personality disorder. New  
47  
48 York: Guilford Press 1993.  
49  
50  
51 44. Bond FW, Bunce D. Mediators of change in emotion-focused and problem-focused  
52  
53 worksite stress management interventions. *J Occup Health Psychol* 2000;5(1):156–63.  
54  
55  
56  
57  
58  
59  
60

- 1  
2  
3  
4 45. Plumb JC, Orsillo SM, Luterek JA. A preliminary test of the role of experiential  
5 avoidance in post-event functioning. *J Behav Ther Exp Psychiatry* 2004;35(3):245–57.  
6  
7  
8 46. Marquez-Gonzalez M, Cabrera I, Losada A. Attentional avoidant biases as mediators  
9 in the association between experiential avoidance and blood pressure in dementia family  
10 caregivers. *Aging Ment Health* 2017:1-9.  
11  
12  
13 47. Hojat M, Gonnella JS, Nasca T, et al. Physician empathy in medical education and  
14 practice:experience with the Jefferson scale of physician empathy. *Semin Integr Med.*  
15 2003:25–41.  
16  
17  
18 48. Gouveia L, Janvier A, Dupuis F, Duval M, Sultan S. Comparing two types of  
19 perspective taking as strategies for detecting distress amongst parents of children with  
20 cancer: A randomised trial. *PLoS One* 2017;12(4):e0175342.  
21  
22  
23 49. Beddoe AE, Murphy SO. Does mindfulness decrease stress and foster empathy  
24 among nursing students? *J Nurs Educ* 2004;43(7):305–12.  
25  
26  
27 50. Galantino M, Baime M, Maguire M, et al. Shortcommunication: association of  
28 psychological and physiological measures of stress in health-care professionals during an  
29 8-week mindfulness meditationprogram: mindfulness in practice. *Stress Health*  
30 2005;21:255–61.  
31  
32  
33 51. Birnie K, Speca M, Carlson LE. Exploring Self-compassion and Empathy in the  
34 Context of Mindfulness-based Stress Reduction (MBSR) *Stress Health* 2010;26(5):359–  
35 71.  
36  
37  
38 52. Lamothe M, Boujut E, Zenasni F, et al. To be or not to be empathic: the combined  
39 role of empathic concern and perspective taking in understanding burnout in general  
40 practice. *BMC Fam Pract* 2014;15:15.  
41  
42  
43  
44  
45  
46  
47  
48  
49  
50  
51  
52  
53  
54  
55  
56  
57  
58  
59  
60



**A. Mindfulness (MAAS)**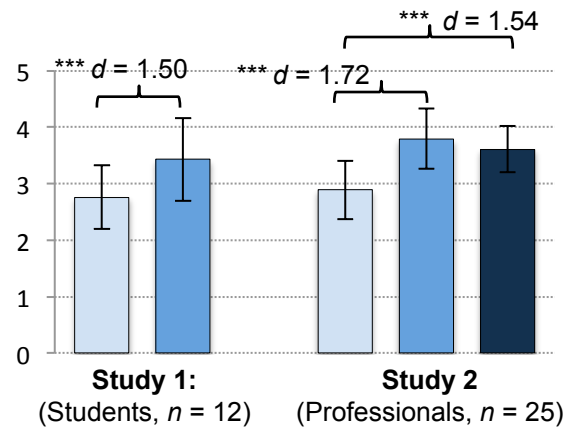**B. Empathy: Perspective Taking (IRI)**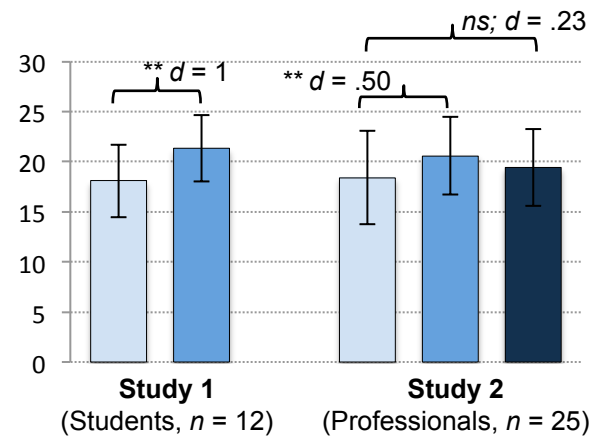**C. Empathy: Empathic Concern (IRI)**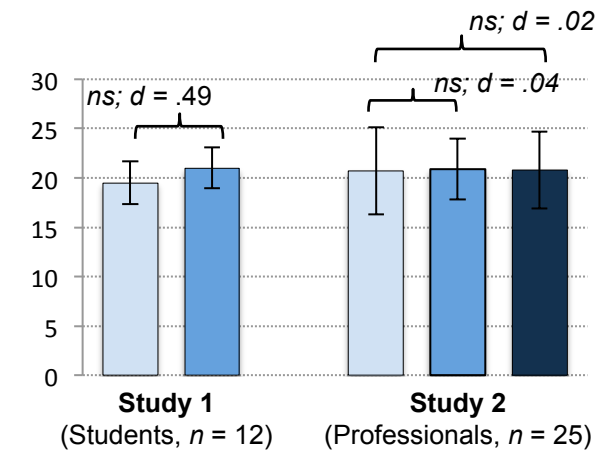**D. Identify my Emotions (PEC)**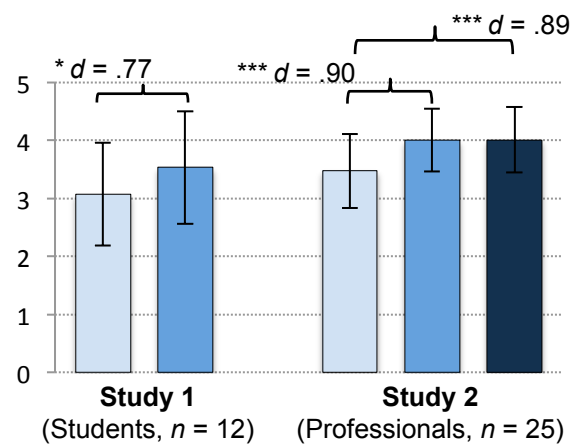**E. Identify Others' Emotions (PEC)**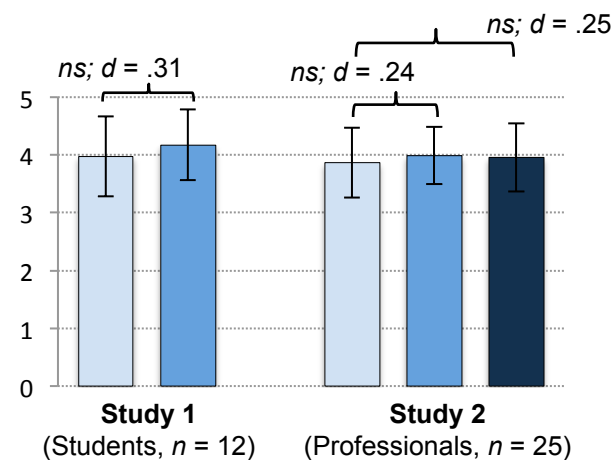**F. Emotional Acceptance (AAQ-II)**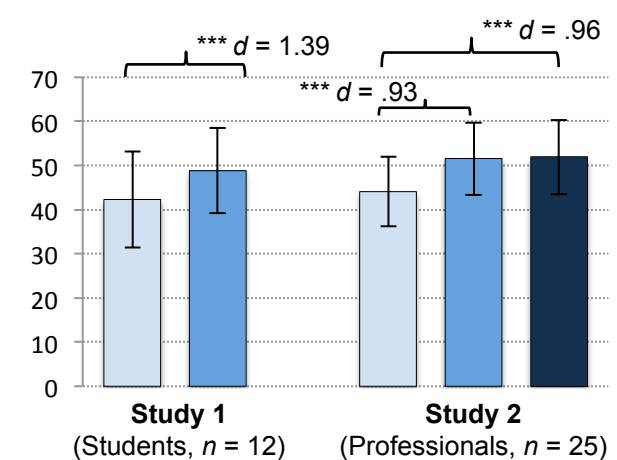**G. Emotional Acceptance (Expressive Suppression; ERQ)**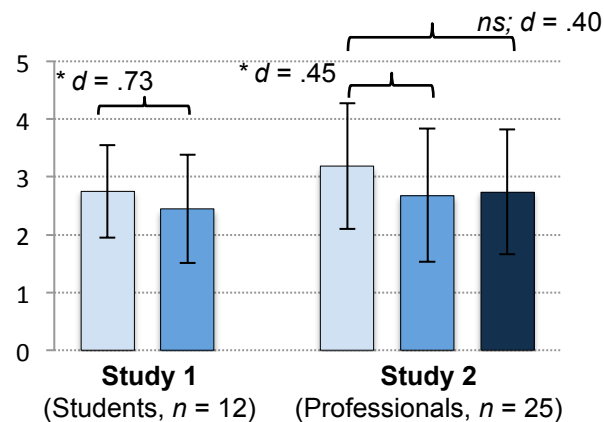**H. Recognition of Others' Emotions' Task (GERT)**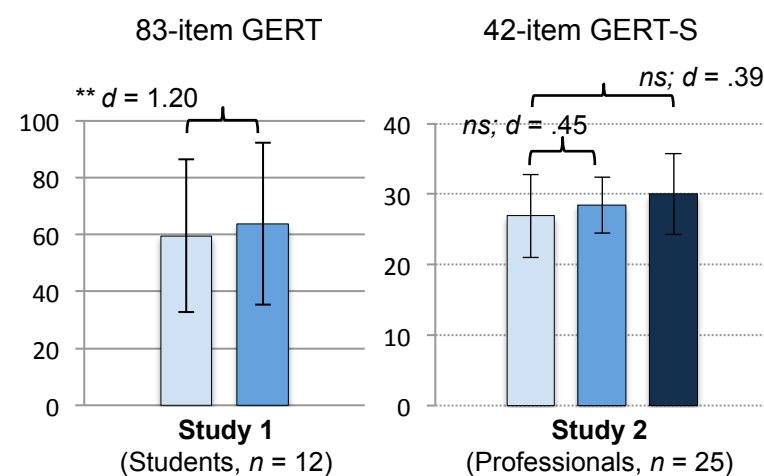

PRE  
POST  
3-MONTH FOLLOW-UP

**FIGURE 1. Changes in Outcomes for Study 1 (12 Students) and Study 2 (25 Professionals) following the PEACE Program.** The Peace Program is an 8-week intervention based on the Mindfulness-Based Stress Reduction (MBSR). **A.** Change in Mindfulness scores as measured by the Attention Awareness Scale (MAAS). **B.** Change in Perspective Taking scores as measured by the Interpersonal Reactivity Index (IRI). **C.** Change in Empathic Concern scores as measured by the Interpersonal Reactivity Index (IRI). **D.** Change in the ability to identify one's own emotions as measured by the Profile of Emotional Competence (PEC). **E.** Change in the ability to identify others' emotions as measured by the Profile of Emotional Competence (PEC). **F.** Change in acceptance as measured by the Acceptance and Action Questionnaire (AAQ-II). **G.** Change in expressive suppression as measured by the Emotion Regulation Scale (ERQ). **H.** Change in the ability to recognize others' emotions in the face, voice and body as measured by the Geneva Emotion Recognition Test (GERT and GERT-S). \*\*\* =  $p < .001$ ; \*\* =  $p < .01$ ; \* =  $p < .05$ . Cohen's  $d$ : .2 = small; .5 = medium; .8 = large; ns = non-significant.

Table S1  
 Study 2 Results of Pairwise Comparisons across time on outcomes measured at pre, post, follow-up of an MBSR-based program followed by 25  
 paediatric haematology-oncology professionals

| Measure                         | (I) Time | (J) Time  | Mean Difference (I-J) | SE    | $p^a$ | $d$  | 95% confidence interval for difference <sup>a</sup> |             |
|---------------------------------|----------|-----------|-----------------------|-------|-------|------|-----------------------------------------------------|-------------|
|                                 |          |           |                       |       |       |      | Lower Bound                                         | Upper Bound |
| Mindfulness (MAAS)              | Pre      | Post      | -.903*                | .140  | .000  | 1.72 | -1.264                                              | -.541       |
|                                 | Pre      | Follow-up | -.719*                | .114  | .000  | 1.54 | -1.014                                              | -.425       |
|                                 | Post     | Follow up | .183                  | .075  | .069  |      | -.011                                               | .378        |
| Perspective Taking (IRI)        | Pre      | Post      | -.310*                | .094  | .009  | .50  | -.551                                               | -.068       |
|                                 | Pre      | Follow-up | -.143                 | .108  | .594  | .23  | -.421                                               | .135        |
|                                 | Post     | Follow up | .167                  | .066  | .056  |      | -.337                                               | .003        |
| Empathic Concern (IRI)          | Pre      | Post      | -.024                 | .102  | 1.00  | .04  | -.283                                               | .236        |
|                                 | Pre      | Follow-up | -.012                 | .112  | 1.00  | .02  | -.300                                               | .277        |
|                                 | Post     | Follow up | .012                  | .119  | 1.00  |      | -.294                                               | .318        |
| Identify my Emotions (PCE)      | Pre      | Post      | -.533*                | .116  | .000  | .90  | .234                                                | .833        |
|                                 | Pre      | Follow-up | -.542*                | .121  | .001  | .89  | -.855                                               | -.229       |
|                                 | Post     | Follow up | -.008                 | .081  | 1.000 |      | -.201                                               | .218        |
| Identify Others' Emotions (PCE) | Pre      | Post      | -.133                 | .095  | .515  | .24  | -.377                                               | .111        |
|                                 | Pre      | Follow-up | -.092                 | .104  | 1.000 | .15  | -.361                                               | .177        |
|                                 | Post     | Follow-up | .042                  | .072  | 1.000 |      | -.145                                               | .228        |
| ACCEPTANCE (AAQ-II)             | Pre      | Post      | -7.458*               | 1.137 | .000  | .93  | -10.395                                             | -4.522      |
|                                 | Pre      | Follow-up | -7.792*               | 1.273 | .000  | .96  | -11.078                                             | -4.506      |
|                                 | Post     | Follow-up | -.333                 | 1.266 | 1.000 |      | -3.603                                              | 2.937       |

1  
2  
3  
4  
5  
6  
7  
8  
9  
10  
11  
12  
13  
14  
15  
16  
17  
18  
19  
20  
21  
22  
23  
24  
25  
26  
27  
28  
29  
30  
31  
32  
33  
34  
35  
36  
37  
38  
39  
40  
41  
42  
43  
44  
45  
46  
47  
48  
49

EXPRESSIVE SUPPRESSION  
(ERQ)

|                               |           |        |       |       |     |        |       |
|-------------------------------|-----------|--------|-------|-------|-----|--------|-------|
| Pre                           | Post      | .500*  | .171  | .023  | .45 | .059   | .941  |
| Pre                           | Follow-up | .438   | .209  | .143  | .40 | -.103  | .978  |
| Post                          | Follow-up | -.063  | .168  | 1.000 |     | -.497  | .372  |
| EMOTION RECOGNITION<br>(GERT) |           |        |       |       |     |        |       |
| Pre                           | Post      | -2.250 | 1.213 | .250  | .45 | -5.517 | 1.017 |
| Pre                           | Follow-up | -2.250 | 1.031 | .136  | .39 | -5.027 | .527  |
| Post                          | Follow-up | .000   | .970  | 1.000 |     | -2.614 | 2.614 |

\* The mean difference is significant at the .05 level.

<sup>a</sup> Adjustment for multiple comparison: Bonferroni.

**NOTE: We didn't find any checklist specifically for our study design (one group pre-post design)**

STROBE Statement—checklist of items that should be included in reports of observational studies

|                              | Item No | Recommendation                                                                                                                                                                                                                                                                                                                                                                                                                                                                                                                                                                                                                                                                                                                    |
|------------------------------|---------|-----------------------------------------------------------------------------------------------------------------------------------------------------------------------------------------------------------------------------------------------------------------------------------------------------------------------------------------------------------------------------------------------------------------------------------------------------------------------------------------------------------------------------------------------------------------------------------------------------------------------------------------------------------------------------------------------------------------------------------|
| <b>Title and abstract</b>    | 1       | (a) Indicate the study's design with a commonly used term in the title or the abstract: <b><u>Page 1</u></b><br>(b) Provide in the abstract an informative and balanced summary of what was done and what was found: <b><u>Page 2 &amp; 3</u></b>                                                                                                                                                                                                                                                                                                                                                                                                                                                                                 |
| <b>Introduction</b>          |         |                                                                                                                                                                                                                                                                                                                                                                                                                                                                                                                                                                                                                                                                                                                                   |
| Background/rationale         | 2       | Explain the scientific background and rationale for the investigation being reported: <b><u>Page 4 &amp; 5</u></b>                                                                                                                                                                                                                                                                                                                                                                                                                                                                                                                                                                                                                |
| Objectives                   | 3       | State specific objectives, including any prespecified hypotheses: <b><u>Page 5</u></b>                                                                                                                                                                                                                                                                                                                                                                                                                                                                                                                                                                                                                                            |
| <b>Methods</b>               |         |                                                                                                                                                                                                                                                                                                                                                                                                                                                                                                                                                                                                                                                                                                                                   |
| Study design                 | 4       | Present key elements of study design early in the paper: <b><u>Page 5 &amp; 6</u></b>                                                                                                                                                                                                                                                                                                                                                                                                                                                                                                                                                                                                                                             |
| Setting                      | 5       | Describe the setting, locations, and relevant dates, including periods of recruitment, exposure, follow-up, and data collection: <b><u>Page 6 &amp; 7</u></b>                                                                                                                                                                                                                                                                                                                                                                                                                                                                                                                                                                     |
| Participants                 | 6       | (a) <i>Cohort study</i> —Give the eligibility criteria, and the sources and methods of selection of participants. Describe methods of follow-up:<br><i>Case-control study</i> —Give the eligibility criteria, and the sources and methods of case ascertainment and control selection. Give the rationale for the choice of cases and controls<br><i>Cross-sectional study</i> —Give the eligibility criteria, and the sources and methods of selection of participants<br><b><u>Page 6 &amp; 7</u></b><br>(b) <i>Cohort study</i> —For matched studies, give matching criteria and number of exposed and unexposed<br><i>Case-control study</i> —For matched studies, give matching criteria and the number of controls per case |
| Variables                    | 7       | Clearly define all outcomes, exposures, predictors, potential confounders, and effect modifiers. Give diagnostic criteria, if applicable: <b><u>Page 9, 10 &amp; 11</u></b>                                                                                                                                                                                                                                                                                                                                                                                                                                                                                                                                                       |
| Data sources/<br>measurement | 8*      | For each variable of interest, give sources of data and details of methods of assessment (measurement). Describe comparability of assessment methods if there is more than one group: <b><u>Page 8</u></b>                                                                                                                                                                                                                                                                                                                                                                                                                                                                                                                        |
| Bias                         | 9       | Describe any efforts to address potential sources of bias: <b><u>Page 11</u></b>                                                                                                                                                                                                                                                                                                                                                                                                                                                                                                                                                                                                                                                  |
| Study size                   | 10      | Explain how the study size was arrived at: <b><u>Page 13, 14 &amp; 15</u></b>                                                                                                                                                                                                                                                                                                                                                                                                                                                                                                                                                                                                                                                     |
| Quantitative variables       | 11      | Explain how quantitative variables were handled in the analyses. If applicable, describe which groupings were chosen and why: <b><u>Page 11</u></b>                                                                                                                                                                                                                                                                                                                                                                                                                                                                                                                                                                               |
| Statistical methods          | 12      | (a) Describe all statistical methods, including those used to control for confounding: <b><u>Page 11</u></b><br>(b) Describe any methods used to examine subgroups and interactions<br>(c) Explain how missing data were addressed<br>(d) <i>Cohort study</i> —If applicable, explain how loss to follow-up was addressed<br><i>Case-control study</i> —If applicable, explain how matching of cases and controls was addressed                                                                                                                                                                                                                                                                                                   |

1  
2  
3  
4  
5  
6  
7  
8  
9  
10  
11  
12  
13  
14  
15  
16  
17  
18  
19  
20  
21  
22  
23  
24  
25  
26  
27  
28  
29  
30  
31  
32  
33  
34  
35  
36  
37  
38  
39  
40  
41  
42  
43  
44  
45  
46  
47  
48  
49  
50  
51  
52  
53  
54  
55  
56  
57  
58  
59  
60

*Cross-sectional study*—If applicable, describe analytical methods taking account of sampling strategy

---

(e) Describe any sensitivity analyses

Continued on next page

For peer review only

**Results**

|                  |     |                                                                                                                                                                                                                                                                                                                                                                                                                                                      |
|------------------|-----|------------------------------------------------------------------------------------------------------------------------------------------------------------------------------------------------------------------------------------------------------------------------------------------------------------------------------------------------------------------------------------------------------------------------------------------------------|
| Participants     | 13* | (a) Report numbers of individuals at each stage of study—eg numbers potentially eligible, examined for eligibility, confirmed eligible, included in the study, completing follow-up, and analysed: <b>Page 13, 14 &amp; 15</b><br>(b) Give reasons for non-participation at each stage : <b>page 13, 14 &amp; 15.</b><br>(c) Consider use of a flow diagram                                                                                          |
| Descriptive data | 14* | (a) Give characteristics of study participants (eg demographic, clinical, social) and information on exposures and potential confounders: <b>Page 13</b><br>(b) Indicate number of participants with missing data for each variable of interest <b>NA</b><br>(c) <i>Cohort study</i> —Summarise follow-up time (eg, average and total amount)                                                                                                        |
| Outcome data     | 15* | <i>Cohort study</i> —Report numbers of outcome events or summary measures over time<br><i>Case-control study</i> —Report numbers in each exposure category, or summary measures of exposure<br><i>Cross-sectional study</i> —Report numbers of outcome events or summary measures                                                                                                                                                                    |
| Main results     | 16  | (a) Give unadjusted estimates and, if applicable, confounder-adjusted estimates and their precision (eg, 95% confidence interval). Make clear which confounders were adjusted for and why they were included<br>(b) Report category boundaries when continuous variables were categorized<br>(c) If relevant, consider translating estimates of relative risk into absolute risk for a meaningful time period<br><b>Page 15, 16, 17, 18 &amp; 19</b> |
| Other analyses   | 17  | Report other analyses done—eg analyses of subgroups and interactions, and sensitivity analyses                                                                                                                                                                                                                                                                                                                                                       |

**Discussion**

|                  |    |                                                                                                                                                                                                             |
|------------------|----|-------------------------------------------------------------------------------------------------------------------------------------------------------------------------------------------------------------|
| Key results      | 18 | Summarise key results with reference to study objectives: <b>Page 19</b>                                                                                                                                    |
| Limitations      | 19 | Discuss limitations of the study, taking into account sources of potential bias or imprecision. Discuss both direction and magnitude of any potential bias: <b>Page 22</b>                                  |
| Interpretation   | 20 | Give a cautious overall interpretation of results considering objectives, limitations, multiplicity of analyses, results from similar studies, and other relevant evidence: <b>Page 19, 20, 22 &amp; 22</b> |
| Generalisability | 21 | Discuss the generalisability (external validity) of the study results <b>NA (Proof-of-concept design, not in the objectives)</b>                                                                            |

**Other information**

|         |    |                                                                                                                                                                               |
|---------|----|-------------------------------------------------------------------------------------------------------------------------------------------------------------------------------|
| Funding | 22 | Give the source of funding and the role of the funders for the present study and, if applicable, for the original study on which the present article is based: <b>Page 24</b> |
|---------|----|-------------------------------------------------------------------------------------------------------------------------------------------------------------------------------|

\*Give information separately for cases and controls in case-control studies and, if applicable, for exposed and unexposed groups in cohort and cross-sectional studies.

**Note:** An Explanation and Elaboration article discusses each checklist item and gives methodological background and published examples of transparent reporting. The STROBE checklist is best used in conjunction with this article (freely available on the Web sites of PLoS Medicine at <http://www.plosmedicine.org/>, Annals of Internal Medicine at <http://www.annals.org/>, and Epidemiology at <http://www.epidem.com/>). Information on the STROBE Initiative is available at [www.strobe-statement.org](http://www.strobe-statement.org).

# BMJ Open

## Developing Professional Caregivers' Empathy and Emotional Competencies Through Mindfulness-Based Stress Reduction (MBSR): Results of two Proof-of-Concept Studies

|                                 |                                                                                                                                                                                                                                                                                                                                                                                                                     |
|---------------------------------|---------------------------------------------------------------------------------------------------------------------------------------------------------------------------------------------------------------------------------------------------------------------------------------------------------------------------------------------------------------------------------------------------------------------|
| Journal:                        | <i>BMJ Open</i>                                                                                                                                                                                                                                                                                                                                                                                                     |
| Manuscript ID                   | bmjopen-2017-018421.R1                                                                                                                                                                                                                                                                                                                                                                                              |
| Article Type:                   | Research                                                                                                                                                                                                                                                                                                                                                                                                            |
| Date Submitted by the Author:   | 14-Sep-2017                                                                                                                                                                                                                                                                                                                                                                                                         |
| Complete List of Authors:       | Lamothe, Martin; University of Montreal, Department of Psychology<br>McDuff, Pierre; University of Montreal, Department of Psychology<br>Pastore, Yves ; Centre Hospitalier Universitaire Sainte-Justine, Department of Hematology-Oncology<br>Duval, Michel; Centre Hospitalier Universitaire Sainte-Justine, Department of Hematology-Oncology<br>Sultan, Serge; University of Montreal, Department of Psychology |
| <b>Primary Subject Heading</b>: | Patient-centred medicine                                                                                                                                                                                                                                                                                                                                                                                            |
| Secondary Subject Heading:      | Complementary medicine                                                                                                                                                                                                                                                                                                                                                                                              |
| Keywords:                       | Mindfulness-Based Stress Reduction, Haematology-Oncology, emotional competence, Emotional Competence, Profesional Caregivers                                                                                                                                                                                                                                                                                        |
|                                 |                                                                                                                                                                                                                                                                                                                                                                                                                     |

SCHOLARONE™  
Manuscripts

**Title of the article:**

Developing Professional Caregivers' Empathy and Emotional Competencies Through Mindfulness-Based Stress Reduction (MBSR): Results of two Proof-of-Concept Studies

Martin Lamothe<sup>1,2</sup>, Pierre McDuff<sup>2</sup>, Yves D. Pastore<sup>1,3,4</sup>, Michel Duval<sup>1,3,4</sup>, Serge Sultan<sup>1,2,3,4</sup>

<sup>1</sup> Charles Bruneau Cancer Care Centre, CHU Sainte-Justine, Montreal, Qc, Canada

<sup>2</sup> Department of Psychology, Université de Montréal, Montreal, Qc, Canada

<sup>3</sup> Department of Pediatrics, Université de Montréal, Montreal, Qc, Canada

<sup>4</sup> Department of Hematology-Oncology, CHU Sainte-Justine, Montreal, Qc, Canada

**Corresponding author:**

Martin Lamothe

Université de Montréal

Pavillon Marie-Victorin PO Box 6128

Succursale Centre-ville

Montreal (Quebec)

CANADA H3C 3J7

E-mail: [martin.lamothe@umontreal.ca](mailto:martin.lamothe@umontreal.ca)

Telephone: 514-273-1659

**Authors' information:**

Martin Lamothe, PhD Candidate

Michel Duval, MD

Pierre McDuff, MSc

Yves D. Pastore, MD

Serge Sultan, PhD

**4) Word count:**

4511 words



## ABSTRACT

**Objectives:** To assess the feasibility and acceptability of an MBSR-based intervention and determine if the intervention is associated with a significant signal on empathy and emotional competencies.

**Design:** Two pre-post proof-of-concept studies.

**Setting:** Participants were recruited at the University of Montreal's Psychology Department (Study 1) and the CHU Sainte-Justine Department of Hematology-Oncology (Study 2).

**Participants:** Study 1: 12 students completed the 8-week program (mean age 24, range 18–34). Study 2: 25 professionals completed the 8-week program (mean age 48, range 27–63).

**Intervention:** Standard MBSR program including 8-week mindfulness program consisting of 8 consecutive weekly 2-hour sessions and a full-day silent retreat.

**Outcomes measures:** Mindfulness as measured by the Mindful Attention Awareness Scale (MAAS); empathy as measured by the Interpersonal Reactivity Index (IRI)'s Perspective Taking and Empathic Concern subscales; identification of one's own emotions and those of others as measured by the Profile of Emotional Competence (PEC)'s Identify my Emotions and Identify Others' Emotions subscales; emotional acceptance as measured by the Acceptance and Action Questionnaire-II (AAQ-II) and the Emotion Regulation Scale (ERQ)'s Expressive Suppression subscale; and recognition of emotions in others as measured by the Geneva Emotion Recognition Test (GERT).

**Results:** In both studies, retention rates (80%–81%) were acceptable. Participants who completed the program improved on all measures except the PEC's Identify Others'

1  
2  
3 Emotions and the IRI's Empathic Concern (Cohen's  $d$  median = .92, range .45–1.72). In  
4  
5 study 2, favourable effects associated with the program were maintained over 3 months  
6  
7  
8 on the PEC's Identify my Emotions, the AAQ-II, the ERQ's Expressive Suppression, and  
9  
10 the GERT.  
11

12  
13 **Conclusions:** The program was feasible and acceptable. It was associated with a  
14  
15 significant signal on the following outcomes: perspective taking, the identification of  
16  
17 one's own emotions, and emotional acceptance thus justifying moving towards efficacy  
18  
19 trials using these outcomes.  
20  
21

22 **Keywords:** Mindfulness-based stress reduction, haematology-oncology, empathy,  
23  
24 emotional competence, professional caregivers  
25  
26  
27  
28

## 29 **STRENGTHS AND LIMITATIONS OF THIS STUDY**

### 30

- 31 • Two feasibility studies of an MBSR-based intervention in students and  
32 professionals had high attendance rates and acceptability levels.  
33
- 34 • Results suggested a significant clinical signal on most measured outcomes in the  
35 domains of emotion regulation and empathy, with effects lasting at follow-up for  
36 identification of one's own emotions and emotional acceptance.  
37
- 38 • The same pattern of results was obtained in two independent small-scale studies.  
39
- 40 • A limitation to these studies is that samples were not randomly selected, had  
41 limited size, and no control groups were used.  
42
- 43 • Another limitation is that most outcomes were self-reported and could be subject  
44 to desirability bias.  
45  
46  
47  
48  
49  
50  
51  
52  
53  
54  
55  
56  
57  
58  
59  
60

## INTRODUCTION

In professional caregivers, empathy and its related emotional processes have been recognized as being of utmost importance[1]. Empathy has been described as a multidimensional construct that encompasses the ability to cognitively adopt another person's point of view (perspective taking) and the tendency to experience other-oriented feelings such as compassion and concern (empathic concern)[2]. A recent meta-analysis suggested that the professional-patient relationship impacts health care outcomes [3]. Higher empathy would relate to better health outcomes in patients, including a reduction in the duration and severity of minor conditions, improved adherence to treatment, higher patient satisfaction, and lower psychological distress[4-7]. In professionals themselves, experimental research from social neuroscience has confirmed the long-standing clinical assumption that difficulty maintaining an adequate emotional distance from the suffering of patients could lead to emotional exhaustion, the latter being a core component of burnout[8]. Research has also shown that sharing emotions without regulating effectively one's emotions could lead to a reduced empathy[9]. Abilities to regulate one's emotions and empathy are all the more important in the context of serious paediatric conditions where professionals are even more likely to develop burnout and exhaustion[10-14].

Emotional competencies are particularly important in a context where being empathetic could have an emotional cost to professional caregivers[15]. To avoid emotional confusion, it is essential that professionals distinguish between their own emotions and their patient's emotions[16]. This is based on an adequate identification of one's own emotions and the emotions of others (i.e., identifying the agent of the emotional experience)[17]. An important skill allowing adequate identification of the

1  
2  
3 source of emotion is to accept emotions as they arise rather than trying to avoid or  
4  
5 suppress them. In this context, three key emotional competencies have been identified as  
6  
7 core to empathic processes: 1) identifying one's own emotions, 2) identifying the  
8  
9 emotions in others, and 3) accepting one's own emotions.  
10  
11

12  
13 Mindfulness-based interventions, including Mindfulness-Based Stress Reduction  
14  
15 (MBSR), are deemed to promote a better awareness and acceptance of emotions as they  
16  
17 occur and therefore could help develop emotional competencies in professional  
18  
19 caregivers[18]. However, despite the importance of empathy in healthcare and the  
20  
21 suggested capacity of mindfulness practice to increase empathy and its related emotional  
22  
23 competencies, these have seldom been selected as primary or secondary outcomes in  
24  
25 previous studies[19,20]. We conducted two interrelated studies to test for the effect of  
26  
27 mindfulness on these outcomes in a population of professionals vulnerable to burnout.  
28  
29

30  
31  
32 The first objective of the studies was to determine if an MBSR-derived program  
33  
34 was a feasible and acceptable intervention for students and professional caregivers  
35  
36 working in a tertiary paediatric haematology-oncology treatment centre. The second  
37  
38 objective was to determine if the program could achieve a significant clinical signal on  
39  
40 empathy and the following emotional competencies: identification of one's own  
41  
42 emotions, identification of others' emotions, and emotional acceptance.  
43  
44  
45  
46  
47

## 48 **METHODS**

### 49 **Design**

50  
51  
52 As recommended in existing program development methodological guidelines  
53  
54 when examining new outcomes of a manualized intervention, we performed two Phase  
55  
56  
57  
58  
59  
60

1  
2  
3  
4  
5  
6  
7  
8  
9  
10  
11  
12  
13  
14  
15  
16  
17  
18  
19  
20  
21  
22  
23  
24  
25  
26  
27  
28  
29  
30  
31  
32  
33  
34  
35  
36  
37  
38  
39  
40  
41  
42  
43  
44  
45  
46  
47  
48  
49  
50  
51  
52  
53  
54  
55  
56  
57  
58  
59  
60

Ia Proof-of-concept studies focusing on feasibility and clinical signals on the new domains in an original population[21]. The first study was used to set up the program and the modalities for data collection in a student population; the second was designed to replicate the first in a professional setting, to extend it to a larger scale, and to include a follow-up. Both studies were designed as one-group pretest-posttest studies to inform future trials. Measures were taken at pre and post for Study 1 and at pre, post, and a 3-month follow-up for Study 2.

### Participants and procedure

Study 1 took place between October 2015 and March 2016 at the University of Montreal and involved university psychology students. Study 2 took place at the CHU Sainte-Justine Department of Hematology-Oncology (Montreal, Canada) from March to May 2016 and involved professional caregivers working in paediatric haematology-oncology. Inclusion criteria for both studies were a) the ability to comply with the requirements of the program, b) no previous participation in MBSR, c) no active substance dependence, d) no psychotic symptoms, and e) no suicidality.

#### Study 1

Participants were recruited at the University of Montreal Psychology Department. All psychology undergraduate and graduate students ( $n = 1,130$ ) were approached by email to participate in this 8-week stress reduction program.

#### Study 2

Participants of Study 2 were recruited among day shift professional caregivers and employees working at the CHU Sainte-Justine Department of Hematology-Oncology

1  
2  
3  
4  
5  
6  
7  
8  
9  
10  
11  
12  
13  
14  
15  
16  
17  
18  
19  
20  
21  
22  
23  
24  
25  
26  
27  
28  
29  
30  
31  
32  
33  
34  
35  
36  
37  
38  
39  
40  
41  
42  
43  
44  
45  
46  
47  
48  
49  
50  
51  
52  
53  
54  
55  
56  
57  
58  
59  
60

( $n = 109$ ). Potential participants were invited to an information meeting. The instructor (ML) met participants who were interested individually.

Participants gave written informed consent before the beginning of the study. They received \$50 (CAD) for the completion of the program and the surveys. The study received full approval from the Research Ethics Committees of the University of Montreal's Faculty of Arts and Sciences and the CHU Sainte-Justine (#2016-1068).

### Intervention

The PEACE Program (French acronym for *Pleine conscience, Empathie, Acceptation et Compétences Émotionnelles*) was modelled on the Mindfulness-Based Stress Reduction (MBSR) developed by Jon Kabat-Zinn[17] which had already been tested in paediatric haematology-oncology (but with other outcomes)[22]. The intervention consisted of eight weekly 2-hour sessions and a full-day silent retreat between session 6 and 7. Participants received a workbook and audio recordings of guided meditations to help them with home practice (See Supplementary File 1 for a transcript from an audio recording distributed to participants). The intervention was led by an instructor with extended meditation practice and training in MBSR at the University of Massachusetts Medical School (ML). To ensure the integrity of the program, the instructor was supervised by a certified MBSR instructor, a pioneer in the field with more than a decade of experience teaching MBSR to caregivers in Canada and Europe (PD, see acknowledgments). All sessions were videotaped for that purpose.

### Feasibility and acceptability

We assessed the feasibility of conducting an 8-week mindfulness-based program with professionals working in paediatric haematology-oncology by evaluating their interest in the program, the retention rates, and adherence to practice. The interest in the program was measured by the proportion of professionals interested among those meeting the eligibility criteria. The retention rate was measured by the proportion of professionals enrolled in the study who completed the study protocol (at least six of the eight weekly sessions). The adherence to practice was estimated by the number of hours of home practice as recorded by the participants, including formal practice (i.e. yoga, meditation, body scan, walking meditation) and informal practice (e.g., being mindful while performing daily tasks such as brushing one's teeth).

We also included three open-ended evaluation questions in the post-study questionnaire to explore the acceptability of the program: (1) "What is your general appreciation of the program?", (2) "What are the obstacles you have encountered during the program?", and (3) "What did you learn from your participation in the program?" In addition, in the pre-study questionnaire, participants were asked to set three personal goals for the program. In the post-study questionnaire, they were asked whether the program had helped them achieve these goals.

### Measures

At all time points, participants completed validated French-language versions of self-report questionnaires electronically via SurveyMonkey®. They also completed an

1  
2  
3 emotion recognition task[23] online via the survey tool of the Qualtrics Research Suite  
4  
5  
6 (Copyright © 2016 Qualtrics, Provo, UT, USA).  
7

## 8 Mindfulness

9  
10 The Mindful Attention Awareness Scale (MAAS)[24] was used to measure  
11  
12 mindfulness. The MAAS is a validated 15-item questionnaire that measures attention to  
13  
14 and awareness of the present moment on a 6-point Likert scale (1 = almost always; 6 =  
15  
16 almost never)[24, 25]. The total score is the mean of the items (range 1–6). An example  
17  
18 of an item is: “I do jobs or tasks automatically, without being aware of what I'm doing”.  
19  
20 The internal consistency coefficient for both Study 1 and Study 2 was  $\alpha = .84$ .  
21  
22  
23

## 24 Empathy

25  
26 Empathy was measured with the Interpersonal Reactivity Index (IRI)[26], a 28-  
27  
28 item answered on a 5-point Likert scale (0=does not describe me well, 4=describes me  
29  
30 very well). Two subscales of the IRI were used for this study (7 items each): the  
31  
32 Perspective Taking (PT) subscale, which measures the tendency to adopt others’  
33  
34 viewpoints (cognitive empathy); and the Empathic Concern (EC) subscale, which  
35  
36 measures the tendency to feel warmth, concern, and compassion for others (emotional  
37  
38 empathy). The score of each subscale is the sum of the items (range 0–28). An example  
39  
40 of a PT item is: “When I'm upset at someone, I usually try to ‘put myself in his shoes’ for  
41  
42 a while”. An example of an EC item is: “I often have tender, concerned feelings for  
43  
44 people less fortunate than me”. In Study 1, the Cronbach alphas were .67 for PT and .75  
45  
46 for EC; in Study 2, the Cronbach alphas were .75 for PT and .73 for EC.  
47  
48  
49  
50  
51  
52  
53  
54  
55  
56  
57  
58  
59  
60



## Emotional Competencies

*Identification of one's own emotions.* Identification of one's own emotions was measured with the Profile of Emotional Competence (PEC)[27], which measures emotional competencies on a 5-point Likert scale (1 = not at all/never; 5 = very well/often). We used the 5-item subscale 'Identify my Emotions'. The score of the subscale is the mean of the items (range 1–5). An example of the items includes: "I am aware of my emotions as soon as they arise". The subscale's Cronbach alphas for Study 1 and Study 2 were .81 and .54, respectively.

*Identification of emotions in others.* Identification of emotions in others was measured with the PEC's 5-item subscale 'Identify Others' Emotions'[27]. The score of the subscale is the mean of the items (range 1–5). "I am good at sensing what others are feeling" ('Identify Others' Emotions'). The subscale's Cronbach alphas for Study 1 and Study 2 were .84 and .67, respectively.

*Emotional acceptance.* Emotional acceptance was measured with the Acceptance & Action Questionnaire-II (AAQ-II), a 10-item questionnaire using a 7-point Likert scale (1 = never true, 7 = always true)[28]. The scale measures experiential avoidance; items were reversed to obtain a measure of acceptance. The score of the scale is the sum of the items (range 10–70). An example of an item is: "I'm afraid of my feelings". The Cronbach alphas for Study 1 and Study 2 were .91 and .79, respectively.

We also used the Emotion Regulation Scale (ERQ)[29], a 7-item questionnaire using a 7-point Likert scale (1=strongly agree, 7=strongly disagree) to assess the suppression of emotions (4-item Expressive Suppression subscale), reflecting less emotional acceptance. The score of the 4-item subscale is the mean of the items (range 1–

1  
2  
3 7). An example of an item is: “ I control my emotions by not expressing them”. The  
4  
5 subscale’s Cronbach alphas for Study 1 and Study 2 were .67 and .84, respectively.  
6  
7

#### 8 9 10 Recognition of others’ emotions task

11  
12 The Geneva Emotion Recognition Test (GERT)[23] was used to measure the  
13  
14 participants’ ability to recognize emotions in others. This is a facial emotion recognition  
15  
16 task consisting of 83 short videos (with audio recordings) in which actors express 14  
17  
18 different emotions. The task can be completed in approximately 20 minutes (10 minutes  
19  
20 for the short version). After each video, participants had to choose which emotion was  
21  
22 expressed by the actor on the video. The full 83-item GERT was used for Study 1 and  
23  
24 due to time concerns the short 42-item version (GERT-S) was used for Study 2[30]. The  
25  
26 score is the sum of the items (range 0–83 for the GERT and 0–42 for the GERT-S).  
27  
28  
29  
30  
31  
32  
33

#### 34 **Statistical analysis**

35  
36 Descriptive statistics were used to describe socio-demographic characteristics of  
37  
38 the samples. We performed Student’s *t*-tests to compare baseline scores of participants in  
39  
40 Study 1 with those of participants in Study 2. For Study 1, we performed Student’s *t*-tests  
41  
42 to compare pre/post differences. For Study 2, we performed General Linear Models  
43  
44 (GLM) with three levels (pre, post, follow-up) that included a Mauchly’s Test of  
45  
46 Sphericity. A Greenhouse-Geisser correction was used when the assumption of sphericity  
47  
48 was violated. Pairwise comparisons were performed with a Bonferroni correction for  
49  
50 multiple comparisons. Statistical significance was established at  $p < .05$ . In line with our  
51  
52 objectives, we computed Cohen’s *d* to assess effect sizes for pre/post, post/follow-up, and  
53  
54  
55  
56  
57  
58  
59  
60

1  
2  
3 pre/follow-up differences. Statistical analyses were performed with IBM SPSS Statistics,  
4  
5  
6 version 24.0 (IBM Corp., Armonk, N.Y., USA).  
7  
8  
9

## 10 RESULTS

### 11 Participants

12  
13  
14  
15 Participants' demographic characteristics for both studies are shown in Table 1.  
16  
17 The mean (*SD*) number of hours of formal practice at home for the entire program was on  
18  
19 average 9.8 (6.2) for Study 1 and 24.9 (12.9) for Study 2. Hours of informal practice were  
20  
21 on average 2.5 (1.8) for Study 1 and 11.4 (15.3) for Study 2.  
22  
23  
24  
25  
26  
27  
28  
29  
30  
31  
32  
33  
34  
35  
36  
37  
38  
39  
40  
41  
42  
43  
44  
45  
46  
47  
48  
49  
50  
51  
52  
53  
54  
55  
56  
57  
58  
59  
60

Table 1  
 Characteristics of Participants

|                                                           | Study 1<br>(Students, $n = 12$ )<br>$n$ (%) / $M$ ( $SD$ ) | Study 2<br>(Professionals, $n = 25$ )<br>$n$ (%) / $M$ ( $SD$ ) |
|-----------------------------------------------------------|------------------------------------------------------------|-----------------------------------------------------------------|
| Sex                                                       |                                                            |                                                                 |
| Female                                                    | 11 (92%)                                                   | 22 (88%)                                                        |
| Male                                                      | 1                                                          | 3                                                               |
| Age                                                       | 24.0 (4.2) range 18–34                                     | 48.1 (10.8) range 27–63                                         |
| Marital status                                            |                                                            |                                                                 |
| Married, civil union, common-law                          | 5 (42%)                                                    | 12 (48%)                                                        |
| Living alone                                              | 7 (58%)                                                    | 13 (52%)                                                        |
| University Level (Study 1) / Level of Education (Study 2) |                                                            |                                                                 |
| College                                                   | -                                                          | 3 (12%)                                                         |
| Bachelor                                                  | 7 (58%)                                                    | 12 (48%)                                                        |
| Master                                                    | -                                                          | 6 (24%)                                                         |
| Doctorate                                                 | 5 (42%)                                                    | 4 (16%)                                                         |
| Profession (Study 2)                                      |                                                            |                                                                 |
| Nurse                                                     | -                                                          | 13 (52%)                                                        |
| Physician                                                 | -                                                          | 2 (8%)                                                          |
| Professionals <sup>a</sup>                                | -                                                          | 4 (16%)                                                         |
| Support Staff <sup>b</sup>                                | -                                                          | 6 (24%)                                                         |

<sup>a</sup> 2 Physiotherapists and 2 Supportive Care Professionals

<sup>b</sup> 4 Research Staff and 2 Community Organization Professionals

## Feasibility and Acceptability

### Study 1

Forty-three students showed interest in participating in the study. Sixteen were interviewed and screened for eligibility, with 15 recruited to take part in the study. Among these, 12/15 completed at least 6 sessions, yielding a retention rate of 80%. Furthermore, 15/15 (100%) completed the pre-intervention survey, 12/15 (80%) completed the post-survey, and 11/12 (92%) attended the one-day silent retreat. Three students (20%) left the program (two after the first

1  
2  
3 session for personal reasons and one after the fourth session due to a scheduling conflict). The  
4  
5 final sample for analyses was thus composed of 12 students.  
6  
7

8 Post-intervention data indicated high levels of satisfaction with the PEACE Program.  
9  
10 Thus, 11/12 (92%) reported that the program had helped them achieve the goals they had set for  
11  
12 themselves and 12/12 (100%) reported that the program made them more aware of their  
13  
14 experience of the present moment. Participants reported that the program was (a) “varied”, b)  
15  
16 “structured”, (c) “instructive”, and (d) “beneficial”. Participants’ comments were positive  
17  
18 regarding their overall appreciation of the program (e.g., “I did it to sleep better and it worked”,  
19  
20 “This program helped me improve my stress management skills and I want to continue  
21  
22 meditating”). Students reported that they had learned from the program (e.g., “I learned that it’s  
23  
24 very important to take time for myself”). The most frequent obstacles reported by the students  
25  
26 were as follows: (a) “the length of the daily home practice”, (b) “lack of assiduity”, (c)  
27  
28 “difficulty finding time for home practice”, (d) “motivation for home practice”, and (e)  
29  
30 “sleepiness during the exercises”.  
31  
32  
33  
34  
35

### 36 Study 2

37  
38 Forty-one out of 109 (38 %) eligible employees showed interest in participating in the  
39  
40 study. Among these, 28/41 (68%) were enrolled in the study; 13/41 (32%) could not participate  
41  
42 due to scheduling conflicts or personal reasons. However, 2/28 (7%) left before the beginning of  
43  
44 the program because of scheduling difficulties. Twenty-six employees were therefore eventually  
45  
46 enrolled in the program. Although one participant (4%) abandoned the program after two  
47  
48 sessions due to a scheduling conflict, 21/26 participants completed at least six sessions, leading  
49  
50 to a retention rate of 81%. Furthermore, 19/26 (73 %) attended the one-day silent retreat, 26/26  
51  
52  
53  
54  
55  
56  
57  
58  
59  
60

1  
2  
3 (100%) completed the pre-intervention survey, 25/26 (96%) completed the post-intervention  
4  
5 survey, and 24/26 (92%) completed the follow-up survey.  
6  
7

8 All employees (100%) who completed the study reported that the program had helped  
9  
10 them achieve the goals they had set for themselves and had made them more aware of their  
11  
12 experience. Participants reported that the program was (a) “excellent”, (b) “interesting”, and (c)  
13  
14 “a very good initiative”. Participants’ comments were positive regarding their overall  
15  
16 appreciation of the program (e.g., “I would recommend it to others”). They reported that they  
17  
18 had learned many things from their participation in the program (e.g., “The importance of living  
19  
20 the present moment and to put oneself in the shoes of the other in the caregiver-patient  
21  
22 relationship”). Obstacles reported by the participants included (a) “lack of time for home  
23  
24 practice”, (b) “lack of time to participate in the 8 weekly sessions”, and (c) “lack of self-  
25  
26 discipline”.  
27  
28  
29  
30  
31  
32  
33

### 34 **Outcome results**

35  
36 A preliminary analysis checked that the program was actually related to changes on the  
37  
38 mindfulness measure. Results showed very large effect sizes pre-post in Study 1,  $d = 1.53$ ;  
39  
40  $t(11)=5.29, p < .001$  and Study 2  $d = 1.72, p < .001$  (Fig. 1A). Changes were also maintained at  
41  
42 follow-up in Study 2,  $d = 1.54, p < .001$ . In Study 2, a repeated measures ANOVA showed  
43  
44 differences in scores over the three time points,  $F(1.43, 32.90) = 35.72, p < .001, \eta_p^2 = .61$ .  
45  
46  
47

48 When comparing Study1 and Study 2 scores at baseline, the differences were small,  
49  
50 except for Identify my Emotions and the Emotion Recognition Task (GERT), and none were  
51  
52 statistically significant (Table S1, Supplementary File 2.) When exploring the size of changes  
53  
54  
55  
56  
57  
58  
59  
60

1  
2  
3 associated with the program, we observed large effect sizes on several pertinent outcomes (Fig.  
4  
5  
6 1).

### 10 Study 1

11  
12 For Study 1 pre/post comparisons, very large effect sizes were observed for the  
13 following: Emotional Acceptance,  $d = 1.39$ ;  $t(11) = 4.81$ ,  $p < .001$  (Fig. 1F); the Emotion  
14 Recognition Task,  $d = 1.20$ ;  $t(11) = 4.14$ ,  $p < .01$  (Fig. 1H); and Perspective Taking ( $d = 1.00$ ;  $t(11)$   
15 = 3.46,  $p < .01$  (Fig. 1B). A medium-to-large effect size was observed for Identify my Emotions  
16 ( $d = .77$ ;  $t(11) = 2.67$ ,  $p < .05$  (Fig 1D); and Expressive Suppression,  $d = .73$ ;  $t(11) = 2.53$ ,  $p < .05$   
17 (Fig. 1G). Empathic Concern (Fig. 1C) and Identify Others' Emotions (Fig. 1E) showed a small-  
18 medium effect size but did not reach statistical significance ( $d = .49$ ;  $t(11) = 1.70$ ,  $p = .118$  and  $d =$   
19  
20  
21  
22  
23  
24  
25  
26  
27  
28  
29  
30  
31  
32  
33  
34  
35  
36  
37  
38  
39  
40  
41  
42  
43  
44  
45  
46  
47  
48  
49  
50  
51  
52  
53  
54  
55  
56  
57  
58  
59  
60  
61  
62  
63  
64  
65  
66  
67  
68  
69  
70  
71  
72  
73  
74  
75  
76  
77  
78  
79  
80  
81  
82  
83  
84  
85  
86  
87  
88  
89  
90  
91  
92  
93  
94  
95  
96  
97  
98  
99  
100  
101  
102  
103  
104  
105  
106  
107  
108  
109  
110  
111  
112  
113  
114  
115  
116  
117  
118  
119  
120  
121  
122  
123  
124  
125  
126  
127  
128  
129  
130  
131  
132  
133  
134  
135  
136  
137  
138  
139  
140  
141  
142  
143  
144  
145  
146  
147  
148  
149  
150  
151  
152  
153  
154  
155  
156  
157  
158  
159  
160  
161  
162  
163  
164  
165  
166  
167  
168  
169  
170  
171  
172  
173  
174  
175  
176  
177  
178  
179  
180  
181  
182  
183  
184  
185  
186  
187  
188  
189  
190  
191  
192  
193  
194  
195  
196  
197  
198  
199  
200  
201  
202  
203  
204  
205  
206  
207  
208  
209  
210  
211  
212  
213  
214  
215  
216  
217  
218  
219  
220  
221  
222  
223  
224  
225  
226  
227  
228  
229  
230  
231  
232  
233  
234  
235  
236  
237  
238  
239  
240  
241  
242  
243  
244  
245  
246  
247  
248  
249  
250  
251  
252  
253  
254  
255  
256  
257  
258  
259  
260  
261  
262  
263  
264  
265  
266  
267  
268  
269  
270  
271  
272  
273  
274  
275  
276  
277  
278  
279  
280  
281  
282  
283  
284  
285  
286  
287  
288  
289  
290  
291  
292  
293  
294  
295  
296  
297  
298  
299  
300  
301  
302  
303  
304  
305  
306  
307  
308  
309  
310  
311  
312  
313  
314  
315  
316  
317  
318  
319  
320  
321  
322  
323  
324  
325  
326  
327  
328  
329  
330  
331  
332  
333  
334  
335  
336  
337  
338  
339  
340  
341  
342  
343  
344  
345  
346  
347  
348  
349  
350  
351  
352  
353  
354  
355  
356  
357  
358  
359  
360  
361  
362  
363  
364  
365  
366  
367  
368  
369  
370  
371  
372  
373  
374  
375  
376  
377  
378  
379  
380  
381  
382  
383  
384  
385  
386  
387  
388  
389  
390  
391  
392  
393  
394  
395  
396  
397  
398  
399  
400  
401  
402  
403  
404  
405  
406  
407  
408  
409  
410  
411  
412  
413  
414  
415  
416  
417  
418  
419  
420  
421  
422  
423  
424  
425  
426  
427  
428  
429  
430  
431  
432  
433  
434  
435  
436  
437  
438  
439  
440  
441  
442  
443  
444  
445  
446  
447  
448  
449  
450  
451  
452  
453  
454  
455  
456  
457  
458  
459  
460  
461  
462  
463  
464  
465  
466  
467  
468  
469  
470  
471  
472  
473  
474  
475  
476  
477  
478  
479  
480  
481  
482  
483  
484  
485  
486  
487  
488  
489  
490  
491  
492  
493  
494  
495  
496  
497  
498  
499  
500  
501  
502  
503  
504  
505  
506  
507  
508  
509  
510  
511  
512  
513  
514  
515  
516  
517  
518  
519  
520  
521  
522  
523  
524  
525  
526  
527  
528  
529  
530  
531  
532  
533  
534  
535  
536  
537  
538  
539  
540  
541  
542  
543  
544  
545  
546  
547  
548  
549  
550  
551  
552  
553  
554  
555  
556  
557  
558  
559  
560  
561  
562  
563  
564  
565  
566  
567  
568  
569  
570  
571  
572  
573  
574  
575  
576  
577  
578  
579  
580  
581  
582  
583  
584  
585  
586  
587  
588  
589  
590  
591  
592  
593  
594  
595  
596  
597  
598  
599  
600  
601  
602  
603  
604  
605  
606  
607  
608  
609  
610  
611  
612  
613  
614  
615  
616  
617  
618  
619  
620  
621  
622  
623  
624  
625  
626  
627  
628  
629  
630  
631  
632  
633  
634  
635  
636  
637  
638  
639  
640  
641  
642  
643  
644  
645  
646  
647  
648  
649  
650  
651  
652  
653  
654  
655  
656  
657  
658  
659  
660  
661  
662  
663  
664  
665  
666  
667  
668  
669  
670  
671  
672  
673  
674  
675  
676  
677  
678  
679  
680  
681  
682  
683  
684  
685  
686  
687  
688  
689  
690  
691  
692  
693  
694  
695  
696  
697  
698  
699  
700  
701  
702  
703  
704  
705  
706  
707  
708  
709  
710  
711  
712  
713  
714  
715  
716  
717  
718  
719  
720  
721  
722  
723  
724  
725  
726  
727  
728  
729  
730  
731  
732  
733  
734  
735  
736  
737  
738  
739  
740  
741  
742  
743  
744  
745  
746  
747  
748  
749  
750  
751  
752  
753  
754  
755  
756  
757  
758  
759  
760  
761  
762  
763  
764  
765  
766  
767  
768  
769  
770  
771  
772  
773  
774  
775  
776  
777  
778  
779  
780  
781  
782  
783  
784  
785  
786  
787  
788  
789  
790  
791  
792  
793  
794  
795  
796  
797  
798  
799  
800  
801  
802  
803  
804  
805  
806  
807  
808  
809  
810  
811  
812  
813  
814  
815  
816  
817  
818  
819  
820  
821  
822  
823  
824  
825  
826  
827  
828  
829  
830  
831  
832  
833  
834  
835  
836  
837  
838  
839  
840  
841  
842  
843  
844  
845  
846  
847  
848  
849  
850  
851  
852  
853  
854  
855  
856  
857  
858  
859  
860  
861  
862  
863  
864  
865  
866  
867  
868  
869  
870  
871  
872  
873  
874  
875  
876  
877  
878  
879  
880  
881  
882  
883  
884  
885  
886  
887  
888  
889  
890  
891  
892  
893  
894  
895  
896  
897  
898  
899  
900  
901  
902  
903  
904  
905  
906  
907  
908  
909  
910  
911  
912  
913  
914  
915  
916  
917  
918  
919  
920  
921  
922  
923  
924  
925  
926  
927  
928  
929  
930  
931  
932  
933  
934  
935  
936  
937  
938  
939  
940  
941  
942  
943  
944  
945  
946  
947  
948  
949  
950  
951  
952  
953  
954  
955  
956  
957  
958  
959  
960  
961  
962  
963  
964  
965  
966  
967  
968  
969  
970  
971  
972  
973  
974  
975  
976  
977  
978  
979  
980  
981  
982  
983  
984  
985  
986  
987  
988  
989  
990  
991  
992  
993  
994  
995  
996  
997  
998  
999  
1000

Table 2  
 Study 1 and Study 2 Outcomes Scores at Different Time-Points

| Measure                                     | Study 1 (Students, N = 12) |           |          |           |          | Study 2 (Professionals, N = 25) |           |          |           |          |           |          |           |
|---------------------------------------------|----------------------------|-----------|----------|-----------|----------|---------------------------------|-----------|----------|-----------|----------|-----------|----------|-----------|
|                                             | PRE                        |           | POST     |           | <i>p</i> | PRE                             |           | POST     |           | <i>p</i> | FOLLOW-UP |          |           |
|                                             | <i>M</i>                   | <i>SD</i> | <i>M</i> | <i>SD</i> |          | <i>M</i>                        | <i>SD</i> | <i>M</i> | <i>SD</i> |          | <i>p</i>  | <i>M</i> | <i>SD</i> |
| Mindfulness (MAAS)                          | 3.11                       | .67       | 3.91     | .88       | < .001   | 3.27                            | .62       | 4.35     | .64       | < .001   | 4.13      | .49      | < .001    |
| Perspective Taking (IRI)                    | 2.58                       | .52       | 3.05     | .47       | .005     | 2.63                            | .67       | 2.94     | .56       | .009     | 2.77      | .55      | .594      |
| Empathic Concern (IRI)                      | 2.79                       | .31       | 3.00     | .29       | .118     | 2.96                            | .63       | 2.98     | .44       | 1.00     | 2.97      | .56      | 1.00      |
| Identify my Emotions (PEC)                  | 3.07                       | .88       | 3.53     | .97       | .022     | 3.47                            | .64       | 4.00     | .54       | < .001   | 4.01      | .57      | .001      |
| Identify Others' Emotions (PEC)             | 3.97                       | .69       | 4.17     | .61       | .301     | 3.86                            | .60       | 3.99     | .50       | .515     | 3.95      | .59      | 1.00      |
| Acceptance (AAQ-II)                         | 42.25                      | 10.83     | 48.83    | 9.61      | .001     | 44.08                           | 7.85      | 51.54    | 8.21      | < .001   | 51.88     | 8.42     | < .001    |
| Expressive Suppression (ERQ)                | 2.75                       | .81       | 2.44     | .94       | .028     | 3.18                            | 1.09      | 2.68     | 1.15      | .023     | 2.74      | 1.09     | .143      |
| Recognition of Emotions (GERT) <sup>a</sup> | 58.58                      | 4.01      | 63.83    | 6.16      | .002     | 26.75                           | 5.89      | 29.00    | 4.00      | .250     | 29.00     | 5.72     | .136      |

MAAS = Mindfulness Attention & Awareness Scale; IRI = Interpersonal Reactivity Index; PEC = Profile of Emotional Competence; AAQ-II = Acceptance & Action Questionnaire; ERQ = Emotion Regulation Questionnaire; GERT = Geneva Emotion Recognition Recognition Test. <sup>a</sup>The 83-item original version of the GERT was used for Study 1 and the 42-item short version (GERT-S) was used for Study 2  
 p values are for changes over time.



## Study 2

The repeated measures ANOVA showed differences in scores over the three time points. These involved the following: Perspective Taking,  $F(1.58, 36.40) = 5.83, p < .01, \eta_p^2 = .20$ ; Identify my Emotions,  $F(2, 46) = 16.64, p < .001, \eta_p^2 = .42$ ; Emotional Acceptance,  $F(2, 46) = 25.78, p < .001, \eta_p^2 = .53$  and Expressive Suppression,  $F(2, 46) = 4.39, p < .01, \eta_p^2 = .16$ . We did not find significant differences on Empathic Concern  $F(2, 46) = .023, p = .977, \eta_p^2 = .001$ ; Identify Others' Emotions  $F(2, 46) = 1.116, p = .336, \eta_p^2 = .046$  and the Emotion Recognition Task  $F(2, 46) = 2.91, p = .07, \eta_p^2 = .16$  (Table 2).

Posthoc pairwise comparisons revealed Pre/Post improvements with large effect sizes for Emotional Acceptance ( $d = .93$ ; Fig. 1F) and Identify my Emotions ( $d = .90$ ; Fig. 1D). A medium effect size was observed for Pre/post differences in Perspective Taking ( $d = .50$ ; Fig. 1B) and Expressive Suppression ( $d = .45$ ; Fig. 1G). A medium effect size was also observed on the Emotion Recognition Task ( $d = .45$ ; Fig. 1H) but that difference was not statistically significant. A small effect size was observed for the Pre/post difference on Identify Others' Emotions ( $d = .24$ ; Fig. 1D) but the difference was not statistically significant. No effect was noted on Empathic Concern ( $d = .04$ ; Fig. 1C; Table S2, Supplementary File 2). In study II, we found that effects associated with the program were maintained over 3 months on the following outcomes: Identify my Emotions (Fig. 1D), Emotional Acceptance (Fig. 1F), Expressive Suppression (Fig. 1G), and the Emotion Recognition Task (Fig. 1H).

When exploring the role of home practice, we did not find correlations between formal practice with changes on outcomes measured in Study 1. In Study 2, formal practice (yoga, sitting meditation, and body scan) was moderately correlated with

1  
2  
3 improvements on Identify my Emotions,  $r = .42$ ;  $p < .05$  and Expressive Suppression,  $r =$   
4  
5  
6  $-.52$ ,  $p < .01$ , but did not correlate with other outcomes. Informal practice did not  
7  
8 correlate with other outcome changes over time.  
9

## 10 11 12 13 **DISCUSSION**

14  
15 These two studies are the first to specifically examine the effects of a  
16  
17 mindfulness-based program on students' and professional caregivers' emotional  
18  
19 competencies. We found that the MBSR-based program is a feasible and acceptable  
20  
21 intervention and that it could achieve an important clinical signal across different  
22  
23 emotional measures, particularly in a vulnerable population, namely professional  
24  
25 caregivers working in paediatric haematology-oncology.  
26  
27

28  
29 Participants in this program showed improvements in their mindfulness skills,  
30  
31 with effect sizes larger than those found in previous studies using the same measure with  
32  
33 professionals in training [31-34] and larger than those reported in studies using other  
34  
35 mindfulness scales with healthcare professionals [35-37]. Participants also improved on  
36  
37 the identification of one's own emotions, with effect sizes larger than those found in  
38  
39 other studies [36, 38]. During the program, participants were specifically instructed to  
40  
41 attend to their own physical sensations, which allowed them to be more aware of their  
42  
43 emotions. Of note, the more professionals practised the formal meditation exercises at  
44  
45 home during the program, the more they reported post-intervention improvements on this  
46  
47 specific emotional competency (Study 2). Moreover, these improvements were  
48  
49 maintained at 3 months post-intervention in Study 2, which suggests that the intervention  
50  
51 could have lasting effects.  
52  
53  
54  
55  
56  
57  
58  
59  
60

1  
2  
3  
4  
5  
6  
7  
8  
9  
10  
11  
12  
13  
14  
15  
16  
17  
18  
19  
20  
21  
22  
23  
24  
25  
26  
27  
28  
29  
30  
31  
32  
33  
34  
35  
36  
37  
38  
39  
40  
41  
42  
43  
44  
45  
46  
47  
48  
49  
50  
51  
52  
53  
54  
55  
56  
57  
58  
59  
60

There was no significant improvement in the self-reported ability to identify others' emotions. This unexpected result could be due to the fact that participants' pre study scores were already high on this outcome. To test this hypothesis, we performed an additional analysis comparing our studies' average baseline scores on the ability to identify other's emotions (PEC's Identify Others' Emotions) with the norms established by the authors of the scale ( $n = 4306$ ) [27]. Participants in both our studies had very similar baseline scores than the established norms (Study 1:  $t(4316) = 1.44, p = .151, d = .42$ ; Study 2:  $t(4329) = 1.36, p = .174, d = .27$ ). This suggests that the participants in our studies were not better at identifying others' emotions at baseline compared to the general population. Thus, there are reasons to believe that the surprising null result for the PEC's Identify Others' Emotions in both our studies could be because all formal meditation exercises focused on being attentive to one's own internal experiences. Perhaps more specific interventions focusing on interpersonal awareness, such as narrative medicine, could be included in the program to teach participants how to attend to others' emotions[35]. In healthcare, correct identification of emotions in patients is crucial for effective communication, good care planning, and patient safety outcomes[39, 40]. Although some of the exercises practised at the weekly meetings were performed in dyads and incorporated mindful communication, this apparently did not spread to the relation to others' emotions, as measured with self-report. This contrasts with results from the emotion recognition task (GERT), a more ecological measure, which allows for a direct measure of participants' ability to recognize a large range of emotions. Interestingly, participants in Study 1 improved significantly on this task with a very large

1  
2  
3 effect size, while the improvement for professionals was not significant. Nevertheless, the  
4  
5  
6 latter showed a medium effect size.

7  
8 Participants also showed improvements in emotional acceptance and these results  
9  
10 were maintained at 3 months post-intervention in Study 2. These results are in line with  
11  
12 previous research, which indirectly measured this competence [36, 38, 41, 42].

13  
14 Mindfulness focuses on the acceptance of one's own experience in the present moment,  
15  
16 whether experienced as positive or negative, without judgment and with an attitude of  
17  
18 openness[18, 43, 44]. Instead of trying to avoid or distract themselves from so-called  
19  
20 negative emotions, participants here were invited to welcome and pay attention to  
21  
22 whatever thoughts and emotions arose in their field of consciousness from moment to  
23  
24 moment. It is essential that professional caregivers learn how to accept their emotions  
25  
26 instead of avoiding or suppressing them. Previous studies have indeed demonstrated that  
27  
28 acceptance was linked to fewer psychological symptoms such as anxiety and  
29  
30 depression[45-47].  
31  
32  
33  
34  
35

36  
37 Furthermore, participants improved in perspective taking. These results are  
38  
39 consistent with those of Krasner et al. (2009), who reported an increased ability for  
40  
41 perspective taking following an 8-week MBSR-based program amongst primary care  
42  
43 physicians using the Jefferson Scale of Physician Empathy (JSPE)[35]. This study  
44  
45 reported a small-to-medium effect size, similar to the effect size found in our second  
46  
47 study with professional caregivers. Different pathways might explain improvements in  
48  
49 perspective taking in our studies. Firstly, a concurrent improvement in emotional  
50  
51 competencies might help caregivers adopt their patients' point of views. To explore this  
52  
53 hypothesis, we performed additional analyses correlating the emotional competencies  
54  
55  
56  
57  
58  
59  
60

1  
2  
3 with perspective taking. Interestingly, change in perspective taking were correlated with  
4  
5 change in the PEC total score, which encompasses interpersonal and intrapersonal  
6  
7 emotional competencies (Study 1;  $r = .67$ ;  $p < .01$ ; Study 2:  $r = .38$ ;  $p = .059$ ). Secondly, it  
8  
9 has been suggested that keeping an *emotional distance* is advisable in patient care in  
10  
11 order to maintain professionals' emotional balance[48]. Perhaps the emotional  
12  
13 competencies measured in this study fostered such a distance. Alternatively, they may  
14  
15 prevent professional caregivers from confounding their personal experience with that of  
16  
17 the patient. A recent study suggests that concentrating too highly on personal emotions is  
18  
19 associated with decreased ability to detect distress in persons affected by cancer[49].  
20  
21 Future studies should explore more systematically the mechanisms underlying the effects  
22  
23 of emotional competencies on perspective taking. Participants did not improve on  
24  
25 empathic concern. Although this result may appear surprising, it is consistent with the  
26  
27 cognitive effect expected from mindfulness training. This result is also in line with  
28  
29 previous results on healthcare providers, which found no significant change on the IRI's  
30  
31 empathic concern[50, 51]. Perhaps mindfulness does not affect empathic concern: a study  
32  
33 found that mindfulness increases perspective taking, but not empathic concern[52].  
34  
35 Future research should disentangle cognitive and affective aspects of empathy as they  
36  
37 seem differently impacted by mindfulness and have been shown to interact when  
38  
39 explaining burnout[53].  
40  
41  
42  
43  
44  
45  
46  
47

48 We should acknowledge certain limitations to our studies. Firstly, participants  
49  
50 were self-selected and sample sizes were limited. However, self-selection is relatively  
51  
52 ecological as it is a reflection of what would happen if the program were offered.  
53  
54 Importantly, a large sample selected at random is not necessary at the proof-of-concept  
55  
56  
57  
58  
59  
60

1  
2  
3 stage[21]. The results of our studies justify progressing toward more rigorous testing with  
4  
5 larger samples in randomized controlled trials. Another limitation lies in the use of self-  
6  
7 reports as they bear desirability. Future studies should include more tasks like the one  
8  
9 used in this study to approach emotional competence before and after training. Another  
10  
11 limitation is the lack of gender balance in our samples. This should be addressed in future  
12  
13 studies, as research has suggested that men could be less responsive to empathy-related  
14  
15 training than women [54]. A final limitation is the low reliability of the ‘Identify my  
16  
17 Emotions’ subscale in Study 2.  
18  
19  
20  
21

22 Notwithstanding these limitations, an important strength of this research is the  
23  
24 replication of results between Study 1 and Study 2 on very different populations. Another  
25  
26 strength is the high attendance rates (80% and 81%, respectively), which could be  
27  
28 explained by the fact that potential participants were well informed about the nature and  
29  
30 the structure of the PEACE program, as well as the required level of commitment before  
31  
32 enrolling. For example, professional caregivers were given the chance to attend an  
33  
34 information session where they could try a brief meditation session and ask questions  
35  
36 about the program before participating in the study. The instructor also met each  
37  
38 participant individually prior to starting the training, in order to evaluate their willingness  
39  
40 and readiness to engage in the program.  
41  
42  
43  
44  
45

46 In conclusion, the results of these two proof-of-concept studies suggest that  
47  
48 MBSR could improve professional caregivers’ perspective taking skills (the cognitive  
49  
50 dimension of empathy), but maybe not their empathic concern (the affective dimension of  
51  
52 empathy). MBSR could also improve professionals’ emotional competencies, such as  
53  
54 identifying and accepting one’s own emotions, which could contribute to the prevention  
55  
56  
57  
58  
59  
60

1  
2  
3 of burnout. MBSR could also be integrated with other forms of interventions to improve  
4 professional caregivers' empathic skills [55]. Furthermore, this research could have  
5  
6 interesting applications in the training and continuing education of professionals not only  
7  
8 in paediatric oncology but also in others emotionally challenging specialities, such as  
9  
10 pulmonology, immunology, and rheumatology.  
11  
12  
13

## 14 15 16 17 **ACKNOWLEDGEMENTS**

18  
19 The authors wish to acknowledge the students and professionals who participated  
20 in the PEACE Programme. We also acknowledge Dr. Patricia Dobkin for her very  
21 helpful advice and supervision. We are grateful to Marie-Claude Charrette for her help in  
22 the recruitment process. We thank Marie-Pier Bilodeau for her work in collecting the  
23 data, and Emilie Rondeau for her work through all the stages of the study. Finally,  
24 particular thanks to Lucie Gouveia and Sarah Bérubé for their suggestions in the writing  
25 of the manuscript.  
26  
27  
28  
29  
30  
31  
32  
33  
34  
35  
36  
37  
38

## 39 **COMPETING INTERESTS**

40 We have read and understood BMJ policy on declaration of interests and declare  
41 that we have no competing interests.  
42  
43  
44  
45  
46  
47

## 48 **DATA SHARING STATEMENT**

49 No additional data available.  
50  
51  
52  
53  
54  
55  
56  
57  
58  
59  
60

## FUNDING

This research was supported by the CHU Sainte-Justine Foundation. ML was supported by Grant No. GSM 136461 from the Canadian Institutes of Health Research (CIHR)—Canada Graduate Scholarships-Master’s Programme and Grant No. 32083 from the Fond de recherche du Québec-Santé (FRQS)—Doctoral training.

## AUTHORS’ CONTRIBUTIONS

ML participated in the design of the study, coordinated the study, performed the statistical analysis, and wrote the manuscript. MD helped design the study and participant recruitment, and revised the manuscript. PM provided advice for the statistical analysis. YP revised the manuscript. SS participated in the design of the study and the coordination of the study, found financial support, and coordinated the writing of the manuscript. All authors read and approved the final manuscript.

## REFERENCES

1. Hojat M. Empathy in patient care : antecedents, development, measurement, and outcomes. New York, NY: Springer 2007.
2. Davis MH. Empathy : a social psychological approach. Madison, Wis.: Brown & Benchmark Publishers 1994.
3. Kelley JM, Kraft-Todd G, Schapira L, et al. The influence of the patient-clinician relationship on healthcare outcomes: a systematic review and meta-analysis of randomized controlled trials. *PLoS One* 2014;9(4):e94207.



- 1  
2  
3 4. Hojat M, Louis DZ, Markham FW, et al. Physicians' empathy and clinical outcomes  
4 for diabetic patients. *Acad Med* 2011;86(3):359–64.  
5  
6
- 7  
8 5. Rakel D, Barrett B, Zhang Z, Hoelt T, et al. Perception of empathy in the therapeutic  
9 encounter: effects on the common cold. *Patient Educ Couns* 2011;85(3):390–7.  
10  
11
- 12 6. Lelorain S, Bredart A, Dolbeault S, et al. A systematic review of the associations  
13 between empathy measures and patient outcomes in cancer care. *Psychooncology*  
14 2012;21(12):1255–64.  
15  
16
- 17 7. Blatt B, LeLacheur SF, Galinsky AD, et al. Does perspective-taking increase patient  
18 satisfaction in medical encounters? *Acad Med* 2010;85(9):1445–52.  
19  
20
- 21 8. Decety J, Yang CY, Cheng Y. Physicians down-regulate their pain empathy response:  
22 an event-related brain potential study. *Neuroimage* 2010;50(4):1676–82.  
23  
24
- 25 9. Decety J, Lamm C. Empathy versus personal distress - recent evidence from social  
26 neuroscience. *The Social Neuroscience of Empathy*. Cambridge, MA: MIT Press 2009.  
27  
28
- 29 10. Altounji D, Morgan H, Grover M, et al. A self-care retreat for pediatric hematology  
30 oncology nurses. *J Pediatr Oncol Nurs* 2013;30(1):18–23.  
31  
32
- 33 11. Mukherjee S, Beresford B, Glaser A, et al. Burnout, psychiatric morbidity, and work-  
34 related sources of stress in paediatric oncology staff: a review of the literature.  
35  
36  
37  
38  
39  
40  
41  
42  
43  
44 *Psychooncology* 2009;18(10):1019–28.  
45
- 46 12. Roth M, Morrone K, Moody K, et al. Career burnout among pediatric oncologists.  
47  
48  
49 *Pediatr Blood Cancer* 2011;57(7):1168–73.  
50
- 51 13. Liakopoulou M, Panaretaki I, Papadakis V, et al. Burnout, staff support, and coping  
52 in Pediatric Oncology. *Support Care Cancer* 2008;16(2):143–50.  
53  
54  
55  
56  
57  
58  
59  
60

- 1  
2  
3  
4  
5  
6  
7  
8  
9  
10  
11  
12  
13  
14  
15  
16  
17  
18  
19  
20  
21  
22  
23  
24  
25  
26  
27  
28  
29  
30  
31  
32  
33  
34  
35  
36  
37  
38  
39  
40  
41  
42  
43  
44  
45  
46  
47  
48  
49  
50  
51  
52  
53  
54  
55  
56  
57  
58  
59  
60
14. Bowden MJ, Mukherjee S, Williams LK, et al. Work-related stress and reward: an Australian study of multidisciplinary pediatric oncology healthcare providers. *Psychooncology* 2015;24(11):1432–8.
15. Gleichgerrcht E, Decety J. The Costs of Empathy among Health Professionals. In: Decety, J, ed. *Empathy: from Bench to Bedside*. London, England: The MIT Press 2012:245–261.
16. Decety J, Meyer M. From emotion resonance to empathic understanding: a social developmental neuroscience account. *Dev Psychopathol* 2008;20(4):1053–80.
17. Decety J. The neurodevelopment of empathy in humans. *Dev Neurosci* 2010;32(4):257–67.
18. Kabat-Zinn J. *Full catastrophe living : using the wisdom of your body and mind to face stress, pain, and illness*. Revised and updated edition. New York, NY: Bantam Books trade paperback 2013.
19. Lamothe M, Rondeau E, Malboeuf-Hurtubise C, et al. Outcomes of MBSR or MBSR-based interventions in health care providers: A systematic review with a focus on empathy and emotional competencies. *Complement Ther Med* 2016;24:19–28.
20. Dean S, et al. The effects of a structured mindfulness program on the development of empathy in healthcare students. *NursingPlus Open*, 2017; 3:1–5.
21. Czajkowski SM, Powell LH, Adler N, et al. From ideas to efficacy: The ORBIT model for developing behavioral treatments for chronic diseases. *Health Psychol* 2015;34(10):971–82.
22. Moody K, Kramer D, Santizo RO, et al. Helping the helpers: mindfulness training for burnout in pediatric oncology-a pilot program. *J Pediatr Oncol Nurs* 2013;30(5):275–84.

- 1  
2  
3  
4 23. Schlegel K, Grandjean D, Scherer KR. Introducing the Geneva emotion recognition  
5 test: an example of Rasch-based test development. *Psychol Assess* 2014;26(2):666–72.  
6  
7  
8 24. Brown KW, Ryan RM. The benefits of being present: mindfulness and its role in  
9 psychological well-being. *J Pers Soc Psychol* 2003;84(4):822–48.  
10  
11 25. Jermann F, Billieux J, Laroï F, et al. Mindful Attention Awareness Scale (MAAS):  
12 Psychometric properties of the French translation and exploration of its relations with  
13 emotion regulation strategies. *Psychol Assess* 2009;21(4):506–14.  
14  
15  
16  
17 26. Davis MH. A multidimensional approach to individual differences in empathy. *JSAS*  
18  
19  
20  
21  
22  
23  
24  
25 27. Brasseur S, Gregoire J, Bourdu R, et al. The Profile of Emotional Competence (PEC):  
26 development and validation of a self-reported measure that fits dimensions of emotional  
27 competence theory. *PLoS One* 2013;8(5):e62635.  
28  
29  
30  
31 28. Bond FW, Hayes SC, Baer RA, et al. Preliminary psychometric properties of the  
32 Acceptance and Action Questionnaire-II: a revised measure of psychological inflexibility  
33 and experiential avoidance. *Behav Ther* 2011;42(4):676–88.  
34  
35  
36  
37 29. Gross JJ, John OP. Individual differences in two emotion regulation processes:  
38 implications for affect, relationships, and well-being. *J Pers Soc Psychol*  
39  
40  
41  
42  
43  
44 2003;85(2):348–62.  
45  
46 30. Schlegel K, Scherer KR. Introducing a short version of the Geneva Emotion  
47 Recognition Test (GERT-S): Psychometric properties and construct validation. *Behav*  
48  
49  
50  
51  
52  
53  
54  
55  
56  
57  
58  
59  
60

- 1  
2  
3  
4  
5  
6  
7  
8  
9  
10  
11  
12  
13  
14  
15  
16  
17  
18  
19  
20  
21  
22  
23  
24  
25  
26  
27  
28  
29  
30  
31  
32  
33  
34  
35  
36  
37  
38  
39  
40  
41  
42  
43  
44  
45  
46  
47  
48  
49  
50  
51  
52  
53  
54  
55  
56  
57  
58  
59  
60
31. Newsome S, Waldo M, Gruszka C. Mindfulness Group Work: Preventing Stress and Increasing Self-Compassion Among Helping Professionals in Training. *The Journal for Specialists in Group Work* 2012;37(4):297–311.
32. Gokhan N, Meehan EF, Peters K. The value of mindfulness-based methods in teaching at a clinical field placement. *Psychol Rep* 2010;106(2):455–66.
33. Cohen JS, Miller LJ. Interpersonal Mindfulness Training for Well-Being: A Pilot Study With Psychology Graduate Students. *Teachers College Record* 2009;111(12):2760–74.
34. Shapiro SL, Brown KW. Teaching Self-Care to Caregivers: Effects of Mindfulness-Based Stress Reduction on the Mental Health of Therapists in Training. *Training and Education in Professional Psychology* 2007;1(2):105–15.
35. Krasner MS, Epstein RM, Beckman H, et al. Association of an educational program in mindful communication with burnout, empathy, and attitudes among primary care physicians. *JAMA* 2009;302(12):1284–93.
36. Amutio A, Martinez-Taboada C, Hermosilla D, Delgado LC. Enhancing relaxation states and positive emotions in physicians through a mindfulness training program: A one-year study. *Psychol Health Med* 2015;20(6):720–31.
37. Brady S, O'Connor N, Burgermeister D. The impact of mindfulness meditation in promoting a culture of safety on an acute psychiatric unit. *Perspect Psychiatr Care* 2012;48(3):129–37.
38. Manotas M, Segura C, Eraso M, et al. Association of Brief Mindfulness Training With Reductions in Perceived Stress and Distress in Colombian Health Care Professionals. *International Journal of Stress Management* 2014;21(2):207–25.

- 1  
2  
3  
4  
5  
6  
7  
8  
9  
10  
11  
12  
13  
14  
15  
16  
17  
18  
19  
20  
21  
22  
23  
24  
25  
26  
27  
28  
29  
30  
31  
32  
33  
34  
35  
36  
37  
38  
39  
40  
41  
42  
43  
44  
45  
46  
47  
48  
49  
50  
51  
52  
53  
54  
55  
56  
57  
58  
59  
60
39. Codier E, Codier D. A model for the role of emotional intelligence in patient safety. *Asia Pac J Oncol Nurs* 2015;2(2):112–7.
40. Codier E, Mueno L, Freitas E. Emotional Intelligence Abilities in Oncology and Palliative Care. *Journal of Hospice and Palliative Nursing* 2011;13(3):183–8.
41. de Vibe M, Solhaug I, Tyssen R, et al. Mindfulness training for stress management: a randomised controlled study of medical and psychology students. *BMC Med Educ* 2013;13:107.
42. Asuero AM, Queralto JM, Pujol-Ribera E, et al. Effectiveness of a mindfulness education program in primary health care professionals: a pragmatic controlled trial. *J Contin Educ Health Prof* 2014;34(1):4–12.
43. Hayes SC, Luoma JB, Bond FW, et al. Acceptance and commitment therapy: model, processes and outcomes. *Behav Res Ther* 2006;44(1):1–25.
44. Linehan M. Cognitive-behavioral treatment of borderline personality disorder. New York: Guilford Press 1993.
45. Bond FW, Bunce D. Mediators of change in emotion-focused and problem-focused worksite stress management interventions. *J Occup Health Psychol* 2000;5(1):156–63.
46. Plumb JC, Orsillo SM, Luterek JA. A preliminary test of the role of experiential avoidance in post-event functioning. *J Behav Ther Exp Psychiatry* 2004;35(3):245–57.
47. Marquez-Gonzalez M, Cabrera I, Losada A. Attentional avoidant biases as mediators in the association between experiential avoidance and blood pressure in dementia family caregivers. *Aging Ment Health* 2017:1-9.

- 1  
2  
3 48. Hojat M, Gonnella JS, Nasca T, et al. Physician empathy in medical education and  
4  
5 practice: experience with the Jefferson scale of physician empathy. *Semin Integr Med*.  
6  
7 2003;25–41.  
8  
9  
10 49. Gouveia L, Janvier A, Dupuis F, Duval M, Sultan S. Comparing two types of  
11  
12 perspective taking as strategies for detecting distress amongst parents of children with  
13  
14 cancer: A randomised trial. *PLoS One* 2017;12(4):e0175342.  
15  
16  
17 50. Beddoe AE, Murphy SO. Does mindfulness decrease stress and foster empathy  
18  
19 among nursing students? *J Nurs Educ* 2004;43(7):305–12.  
20  
21  
22 51. Galantino M, Baime M, Maguire M, et al. Shortcommunication: association of  
23  
24 psychological and physiological measures of stress in health-care professionals during an  
25  
26 8-week mindfulness meditation program: mindfulness in practice. *Stress Health*  
27  
28 2005;21:255–61.  
29  
30  
31 52. Birnie K, Speca M, Carlson LE. Exploring Self-compassion and Empathy in the  
32  
33 Context of Mindfulness-based Stress Reduction (MBSR) *Stress Health* 2010;26(5):359–  
34  
35 71.  
36  
37  
38 53. Lamothe M, Boujut E, Zenasni F, et al. To be or not to be empathic: the combined  
39  
40 role of empathic concern and perspective taking in understanding burnout in general  
41  
42 practice. *BMC Fam Pract* 2014;15:15.  
43  
44  
45 54. Hall JA, Blanch-Hartigan D, Roter DL. Patients' satisfaction with male versus female  
46  
47 physicians: a meta-analysis. *Med Care* 2011;49(7): 611–7.  
48  
49  
50 55. Riess H, Kelley JM, Bailey RW, et al. Empathy training for resident physicians: a  
51  
52 randomized controlled trial of a neuroscience-informed curriculum. *J Gen Intern Med*  
53  
54 2012;27(10):1280–6.  
55  
56  
57  
58  
59  
60

1  
2  
3  
4  
5  
6  
7  
8  
9  
10  
11  
12  
13  
14  
15  
16  
17  
18  
19  
20  
21  
22  
23  
24  
25  
26  
27  
28  
29  
30  
31  
32  
33  
34  
35  
36  
37  
38  
39  
40  
41  
42  
43  
44  
45  
46  
47  
48  
49  
50  
51  
52  
53  
54  
55  
56  
57  
58  
59  
60

**FIGURE 1. Changes in Outcomes for Study 1 (12 Students) and Study 2 (25 Professionals) following the PEACE Program.** The Peace Program is an 8-week intervention based on the Mindfulness-Based Stress Reduction (MBSR). **A.** Change in Mindfulness scores as measured by the Attention Awareness Scale (MAAS). **B.** Change in Perspective Taking scores as measured by the Interpersonal Reactivity Index (IRI). **C.** Change in Empathic Concern scores as measured by the Interpersonal Reactivity Index (IRI). **D.** Change in the ability to identify one's own emotions as measured by the Profile of Emotional Competence (PEC). **E.** Change in the ability to identify others' emotions as measured by the Profile of Emotional Competence (PEC). **F.** Change in acceptance as measured by the Acceptance and Action Questionnaire (AAQ-II). **G.** Change in expressive suppression as measured by the Emotion Regulation Scale (ERQ). **H.** Change in the ability to recognize others' emotions in the face, voice and body as measured by the Geneva Emotion Recognition Test (GERT and GERT-S). \*\*\* =  $p < .001$ ; \*\* =  $p < .01$ ; \* =  $p < .05$ . Cohen's  $d$ : .2 = small; .5 = medium; .8 = large; ns = non-significant.

1  
2  
3  
4  
5  
6  
7  
8  
9  
10  
11  
12  
13  
14  
15  
16  
17  
18  
19  
20  
21  
22  
23  
24  
25  
26  
27  
28  
29  
30  
31  
32  
33  
34  
35  
36  
37  
38  
39  
40  
41  
42  
43  
44  
45  
46  
47  
48  
49  
50  
51  
52  
53  
54  
55  
56  
57  
58  
59  
60

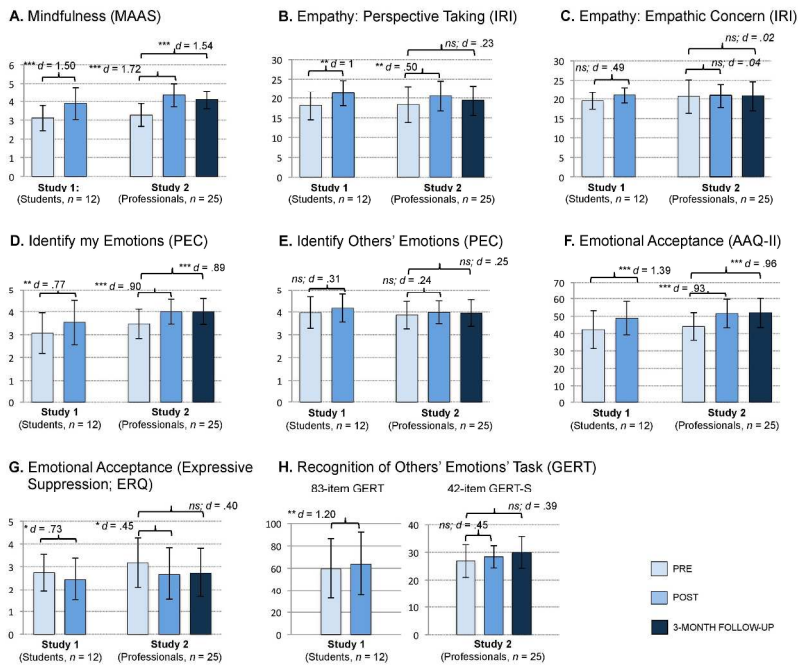

338x304mm (300 x 300 DPI)

only



1  
2  
3  
4  
5  
6  
7  
8  
9  
10  
11  
12  
13  
14  
15  
16  
17  
18  
19  
20  
21  
22  
23  
24  
25  
26  
27  
28  
29  
30  
31  
32  
33  
34  
35  
36  
37  
38  
39  
40  
41  
42  
43  
44  
45  
46  
47  
48  
49  
50  
51  
52  
53  
54  
55  
56  
57  
58  
59  
60

# PEACE PROGRAM SITTING MEDITATION SCRIPT

Adapted from *Guided Mindfulness Meditation, Series 1*  
(Jon Kabat-Zinn)

**Centre de Psycho-Oncologie**  
Department of Hematology-Oncology  
Centre Hospitalier Universitaire Sainte-Justine  
3175 Chemin de la Côte Sainte-Catherine  
Montreal, Quebec, Canada H3T 1C5

**CPO** Centre  
Psycho  
Oncologie

 **CHU Sainte-Justine**  
Le centre hospitalier  
universitaire mère-enfant

Université   
de Montréal

## 40 Min Sitting Meditation (English version)

To practise this meditation, choose a quiet and relaxing place where you won't be disturbed. Allow yourself to set aside your usual mode of operation, which is generally a goal-oriented mode, a 'doing mode'. Allow yourself to be in a 'non-doing-mode' for a few moments. Allow yourself to simply 'be'.

To begin this meditation, sit up straight in a chair, or on a cushion on the floor, your back straight but not tense. Let your eyes close gently, or gaze toward the floor a few feet in front of you. Then simply bring your attention to the fact that you're breathing. Become aware of the movement of the breath, the natural normal breath.

Just be aware of the breath without trying to change it in any way. Focus your attention on your abdomen or on the sensations around your nostrils. If you choose to focus on your nostrils, feel the touch of the breath in that area. If you choose to focus on the abdomen area, feel the sensations in your belly as it expands with each inhalation and falls with each exhalation. Simply stay with the breath.

From time to time you may notice that your attention has shifted to thoughts – memories of the past or worries about the future. When you realize that your attention is no longer here, no longer with your breathing, gently bring your attention back to your breathing, without judging yourself. And just observe the movement of the breath.

Each time you realize that your attention is no longer with your breathing, try to become aware of it, as soon as possible, and gently bring your attention back to your breathing. During meditation, you can use your breathing to refocus your attention. You can use the breath as an anchor, to help you come back to the present moment.

When you realize that your mind is no longer in the present or is preoccupied or 'reactive' you can use your breathing to come back to the present moment.

While observing the breath, you may notice from time to time that sensations in the body enter your field of consciousness. Perhaps feelings of discomfort, tension, or even pain, which can be very intense at times.

And now, while maintaining awareness of the breathing, try to see if you can expand your field of awareness around your breathing, to also include sensations in

1  
2  
3  
4  
5  
6  
7  
8  
9  
10  
11  
12  
13  
14  
15  
16  
17  
18  
19  
20  
21  
22  
23  
24  
25  
26  
27  
28  
29  
30  
31  
32  
33  
34  
35  
36  
37  
38  
39  
40  
41  
42  
43  
44  
45  
46  
47  
48  
49  
50  
51  
52  
53  
54  
55  
56  
57  
58  
59  
60

your entire body. Become aware of the physical sensations. Perhaps the contact of your body with the cushion, or with the chair, or with the ground. Perhaps the contact of your feet or legs with the floor. So now expand your awareness to include not only your breathing but also the sense of your body as a whole, with all the sensations that can occur from one moment to another.

At times, sensations in one part of your body can become very intense and dominate your field of awareness. It then becomes very difficult to stay alert and focused. If this happens, you have two options. One option is to consciously adopt a more comfortable posture to release some of the intensity. If you decide to change your posture, try to be aware of the intention to change before doing so and then try to be aware of the sensations in your body as you change your posture. Another option is to focus all your attention on the area of your body where the intensity is and simply breathe with that sensation. Simply inhaling and exhaling with the sensation... Trying not to create tension, but trying to accept the sensations as they present themselves.

Now, if you want, you can change the focus of your attention from the breathing and the body sensations to the sounds in the environment. Perhaps the sounds in the room or outside the room, or perhaps the sounds inside the body. Do not search for sounds, but rather try to be receptive to anything that enters your field of consciousness as sounds. It's not necessary to identify these sounds or to label them. Try not to judge or label them as 'nice' or 'unpleasant' but only observe them for what they are.

Now, once again allow your field of consciousness to expand. We started with the breathing. Then we expanded our awareness to include the body as a whole and the sensations in the body, and then we included the sounds. This time, direct your attention to your thoughts. So now the body's sensations, the breathing, and the sounds are going to be in the *background* of your awareness, bring the thoughts to the *foreground*. Rather than seeing thoughts as interruptions in your meditation, now focus your attention on thoughts themselves, on the process of thought. Do not follow thoughts and do not engage in them, but rather try to perceive a thought as an 'observable event' in your field of consciousness, much like a sound was an 'observable event' previously. Let the thoughts come and go. Thoughts may be neutral or charged with emotions. If thoughts contain fear, be aware of the fear and let the thoughts come and go. Same thing for concerns or worries, thoughts of obligation or thoughts of deadlines.... Just stay present. Don't pursue thoughts or push them away.

1  
2  
3  
4  
5  
6  
7  
8  
9  
10  
11  
12  
13  
14  
15  
16  
17  
18  
19  
20  
21  
22  
23  
24  
25  
26  
27  
28  
29  
30  
31  
32  
33  
34  
35  
36  
37  
38  
39  
40  
41  
42  
43  
44  
45  
46  
47  
48  
49  
50  
51  
52  
53  
54  
55  
56  
57  
58  
59  
60

Now, for the remainder of this meditation, let go of any object of attention and simply pay attention to the present moment. Rather than focusing on a particular object, allow yourself to be fully present of everything that happens in the body and in the mind from one moment to another. If thoughts come, observe those thoughts. If sensations come, observe those sensations. If sounds come, observe those sounds. Just stay aware of everything that happens from moment to moment.

And now, as this meditation ends, you can, if you want, take a moment to congratulate yourself for having taken this time to take care of yourself.

Free adaptation of *Sitting Meditation – Guided Mindfulness Meditation, Series 1* (Jon Kabat-Zinn) by Martin Lamothe

## 40 Min Sitting Meditation (Original French version)

### Méditation Assise (40 min.)

Pour pratiquer cette méditation, choisissez un endroit calme et relaxant où vous ne serez pas dérangé. Permettez-vous de mettre de côté votre mode de fonctionnement habituel, qui est en général un mode de fonctionnement dirigé vers l'action. Permettez-vous pendant les instants qui viennent de vous mettre dans un mode de « non-action ». Permettez-vous simplement d'être pendant un moment, de devenir conscient de votre être.

Pour commencer cette méditation, asseyez-vous confortablement sur une chaise ou sur un coussin sur le sol, le dos droit autant que possible, mais non tendu. Laissez les yeux se fermer doucement ou encore baissez le regard et fixez le sol à quelques pieds devant vous. Puis ramenez simplement votre attention sur le fait que vous respirez. Devenez conscient du mouvement de la respiration normale et naturelle.

Soyez simplement attentif à la respiration sans chercher à la modifier d'aucune façon que ce soit. Focalisez votre attention sur l'abdomen ou encore au niveau des narines. Si vous choisissez les narines, sentez le contact de l'air en inspirant et en expirant. Si vous choisissez l'abdomen, sentez le ventre se gonfler à chaque inspiration et se contracter à chaque expiration. Restez simplement avec la respiration.

À l'occasion, votre attention peut se diriger vers des pensées, des inquiétudes, des souvenirs du passé ou des pensées tournées vers le futur. Lorsque vous vous rendez compte que votre attention n'est plus ici avec votre respiration, sans jugement, doucement, ramenez votre attention à votre respiration. Et simplement, observez le mouvement de la respiration.

Et chaque fois que vous vous apercevez que votre attention n'est plus avec votre respiration, essayez d'en être conscient le plus rapidement possible, et tout doucement ramenez votre attention à votre respiration. Durant la méditation, vous pouvez utiliser votre respiration pour recentrer votre attention, pour vous aider à vous ancrer dans le moment présent.

Lorsque vous vous rendez compte que votre esprit n'est plus dans le présent ou est préoccupé ou réactif, vous pouvez utiliser votre respiration pour revenir au moment présent.

1  
2  
3  
4  
5 Lorsque vous observez votre respiration, vous notez peut-être à l'occasion  
6 que des sensations dans votre corps entrent dans le champ de votre conscience.  
7 Peut-être des inconforts ou des agitations, qui peuvent être très intenses par  
8 moments.  
9

10  
11 Et maintenant, tout en maintenant la conscience de votre respiration, essayez  
12 d'élargir le champ de votre conscience autour de votre respiration afin d'inclure  
13 aussi la sensation de votre corps dans son entier. Devenez conscient de toutes les  
14 sensations dans votre corps. Peut-être le contact du corps avec le coussin ou avec la  
15 chaise, peut-être le contact des pieds ou des jambes avec le sol. Donc maintenant,  
16 permettez à votre observation d'inclure, non seulement votre respiration, mais  
17 également la perception du corps dans son entier, avec toutes les sensations qui  
18 peuvent se présenter d'un moment à l'autre. Et soyez ici, avec tout ce qui se  
19 présente, sans le juger ou sans y réagir; soyez simplement présent aux sensations et  
20 à la respiration.  
21  
22  
23  
24  
25  
26

27 Il est possible qu'à un moment des sensations dans une partie du corps  
28 deviennent très intenses et dominant le champ de votre conscience. Il devient alors  
29 très difficile de rester attentif et concentré. Si cela se produit, vous avez 2 options. La  
30 première option est de consciemment adopter une position plus confortable pour  
31 laisser aller une partie de l'intensité. Si vous décidez de changer de position, essayez  
32 d'être conscient de l'intention de changer avant de le faire et d'être conscient des  
33 sensations dans le corps lorsque vous modifiez votre posture. Une autre option est  
34 de focaliser toute l'attention sur la région du corps où se trouve l'intensité et de  
35 respirer avec cette sensation. Simplement, inspirez et expirez avec la sensation... en  
36 essayant de ne pas créer de tension, et en essayant d'accepter les sensations telles  
37 qu'elle se présentent.  
38  
39  
40  
41  
42  
43

44 Maintenant, si vous le désirez, changez le *focus* de votre attention, de la  
45 respiration et des sensations du corps, vers les sons dans l'environnement. Peut-  
46 être les sons à l'intérieur de la pièce ou à l'extérieur de la pièce, ou peut-être les sons  
47 à l'intérieur du corps. Ne cherchez pas quelque chose à écouter, mais soyez plutôt  
48 réceptif à tout ce qui entre dans le champ de votre conscience en tant que son. Il  
49 n'est pas nécessaire d'identifier les sons, de nommer les sons; tentez de ne pas juger  
50 les sons comme « agréable » ou « désagréable », mais observez-les seulement pour  
51 ce qu'ils sont.  
52  
53  
54  
55

56 Maintenant, encore une fois permettez au champ de votre conscience de  
57 s'élargir. Nous avons débuté avec la respiration. Ensuite, nous avons élargi la  
58  
59  
60

1  
2  
3  
4  
5  
6  
7  
8  
9  
10  
11  
12  
13  
14  
15  
16  
17  
18  
19  
20  
21  
22  
23  
conscience pour inclure le corps dans son entier, puis les sensations, et ensuite nous  
avons inclus les sons. Cette fois-ci, dirigez votre attention vers les pensées.  
Maintenant, les sensations du corps, la respiration et les sons vont être en *arrière*  
*plan*; amenez les pensées à *l'avant-plan*. Plutôt que de voir les pensées comme des  
interruptions dans votre méditation, portez toute votre attention aux pensées  
comme telles, au processus de la pensée. Ne suivez pas la pensée et ne vous engagez  
pas dans la pensée, mais essayez plutôt de percevoir la pensée comme un  
« évènement observable » dans le champ de la conscience, un peu comme un son  
était un « évènement observable ». Et laissez les pensées aller et venir. Les pensées  
peuvent être neutres ou encore très chargées. Par exemple, si des pensées  
contiennent de la peur, soyez conscient de la peur. Et laissez aller et venir les  
pensées. Même chose pour les préoccupations ou les inquiétudes, les pensées  
d'obligation ou de *deadline*... Peu importe la charge de la pensée, restez simplement  
présent. Ne poursuivez pas la pensée, mais ne cherchez pas non plus à la repousser.

24  
25  
26  
27  
28  
29  
30  
31  
32  
33  
34  
Maintenant, pour le temps qui reste, laissez aller tout objet d'attention et  
portez simplement attention au moment présent. Plutôt que de focaliser sur un  
objet en particulier, permettez-vous d'être pleinement attentif à tout ce qui survient  
dans le corps et dans l'esprit d'un moment à l'autre. Si des pensées viennent,  
observez les pensées. Si des sensations viennent, observez les sensations. Si ce sont  
des sons qui viennent, observez les sons. Simplement, restez attentif à tout ce qui se  
présente d'un moment à l'autre.

35  
36  
37  
38  
39  
Et maintenant, comme cette méditation se termine, vous pouvez, si vous le  
voulez, prendre un moment pour vous féliciter d'avoir pris ces instants pour  
prendre soin de vous.

40  
41  
42  
43  
44  
45  
46  
47  
48  
49  
50  
51  
52  
53  
54  
55  
56  
57  
58  
59  
60  
Traduction et adaptation libre de *Sitting Meditation – Guided Mindfulness Meditation*,  
*Series 1 (Jon Kabat-Zinn)* par Martin Lamothe



1  
2  
3  
4  
5  
6  
7  
8  
9  
10  
11  
12  
13  
14  
15  
16  
17 *Developing Professional Caregivers' Empathy and Emotional Competencies Through*  
18 *Mindfulness-Based Stress Reduction (MBSR): Results of two Proof-of-Concept Studies*  
19  
20  
21

22  
23 **SUPPLEMENTARY TABLES**  
24  
25

26 **Centre de Psycho-Oncologie**  
27 Department of Hematology-Oncology  
28 Centre Hospitalier Universitaire Sainte-Justine  
29 3175 Chemin de la Côte Sainte-Catherine  
30 Montreal, Quebec, Canada H3T 1C5  
31  
32  
33  
34  
35  
36  
37  
38  
39  
40  
41  
42  
43



Table S1  
*Study 1 and Study 2 Participants Compared at Baseline*

| Measure                                     | Study 1<br>(Students, N = 12) |           | Study 2<br>(Professionals, N = 25) |           | Study 1 vs Study 2<br>Scores at Baseline |           |          |          |
|---------------------------------------------|-------------------------------|-----------|------------------------------------|-----------|------------------------------------------|-----------|----------|----------|
|                                             | <i>M</i>                      | <i>SD</i> | <i>M</i>                           | <i>SD</i> | <i>t</i>                                 | <i>df</i> | <i>p</i> | <i>d</i> |
| Mindfulness (MAAS)                          | 3.11                          | .67       | 3.27                               | .13       | 1.166                                    | 35        | .256     | .41      |
| Perspective Taking (IRI)                    | 2.58                          | .52       | 2.63                               | .67       | .227                                     | 35        | .822     | .08      |
| Empathic Concern (IRI)                      | 2.79                          | .31       | 2.96                               | .63       | .880                                     | 35        | .385     | .31      |
| Identify my Emotions (PEC)                  | 3.07                          | .88       | 3.47                               | .64       | 1.573                                    | 35        | .125     | .55      |
| Identify Others' Emotions (PEC)             | 3.97                          | .69       | 3.86                               | .60       | .497                                     | 35        | .622     | .18      |
| Acceptance (AAQ-II)                         | 42.25                         | 10.83     | 44.08                              | 7.85      | .586                                     | 35        | .562     | .21      |
| Expressive Suppression (ERQ)                | 2.75                          | .81       | 3.18                               | 1.09      | 1.212                                    | 35        | .234     | .43      |
| Recognition of Emotions (GERT) <sup>a</sup> | 58.58                         | 4.01      | 52.89                              | 11.29     | 1.69                                     | 35        | .106     | .59      |

<sup>a</sup> Study 2 GERT's mean was adjusted to take into account the difference in the number of items between the 2 versions of the task (83-item GERT for Study 1 and 42-item GERT-S for Study 2)

Table S2

Study 2 Results of Pairwise Comparisons across time on outcomes measured at pre, post, follow-up of an MBSR-based program followed by 25 paediatric haematology-oncology professionals

| Measure                         | (I) Time | (J) Time  | Mean Difference (I-J) | SE    | $p^a$ | $d$  | 95% confidence interval for difference <sup>a</sup> |             |
|---------------------------------|----------|-----------|-----------------------|-------|-------|------|-----------------------------------------------------|-------------|
|                                 |          |           |                       |       |       |      | Lower Bound                                         | Upper Bound |
| Mindfulness (MAAS)              | Pre      | Post      | -.903*                | .140  | .000  | 1.72 | -1.264                                              | -.541       |
|                                 | Pre      | Follow-up | -.719*                | .114  | .000  | 1.54 | -1.014                                              | -.425       |
|                                 | Post     | Follow up | .183                  | .075  | .069  |      | -.011                                               | .378        |
| Perspective Taking (IRI)        | Pre      | Post      | -.310*                | .094  | .009  | .50  | -.551                                               | -.068       |
|                                 | Pre      | Follow-up | -.143                 | .108  | .594  | .23  | -.421                                               | .135        |
|                                 | Post     | Follow up | .167                  | .066  | .056  |      | -.337                                               | .003        |
| Empathic Concern (IRI)          | Pre      | Post      | -.024                 | .102  | 1.00  | .04  | -.283                                               | .236        |
|                                 | Pre      | Follow-up | -.012                 | .112  | 1.00  | .02  | -.300                                               | .277        |
|                                 | Post     | Follow up | .012                  | .119  | 1.00  |      | -.294                                               | .318        |
| Identify my Emotions (PCE)      | Pre      | Post      | -.533*                | .116  | .000  | .90  | .234                                                | .833        |
|                                 | Pre      | Follow-up | -.542*                | .121  | .001  | .89  | -.855                                               | -.229       |
|                                 | Post     | Follow up | -.008                 | .081  | 1.000 |      | -.201                                               | .218        |
| Identify Others' Emotions (PCE) | Pre      | Post      | -.133                 | .095  | .515  | .24  | -.377                                               | .111        |
|                                 | Pre      | Follow-up | -.092                 | .104  | 1.000 | .15  | -.361                                               | .177        |
|                                 | Post     | Follow-up | .042                  | .072  | 1.000 |      | -.145                                               | .228        |
| ACCEPTANCE (AAQ-II)             | Pre      | Post      | -7.458*               | 1.137 | .000  | .93  | -10.395                                             | -4.522      |
|                                 | Pre      | Follow-up | -7.792*               | 1.273 | .000  | .96  | -11.078                                             | -4.506      |
|                                 | Post     | Follow-up | -.333                 | 1.266 | 1.000 |      | -3.603                                              | 2.937       |

EXPRESSIVE SUPPRESSION  
(ERQ)

|      |           |       |      |       |     |       |      |
|------|-----------|-------|------|-------|-----|-------|------|
| Pre  | Post      | .500* | .171 | .023  | .45 | .059  | .941 |
| Pre  | Follow-up | .438  | .209 | .143  | .40 | -.103 | .978 |
| Post | Follow-up | -.063 | .168 | 1.000 |     | -.497 | .372 |

EMOTION RECOGNITION  
(GERT)

|      |           |        |       |       |     |        |       |
|------|-----------|--------|-------|-------|-----|--------|-------|
| Pre  | Post      | -2.250 | 1.213 | .250  | .45 | -5.517 | 1.017 |
| Pre  | Follow-up | -2.250 | 1.031 | .136  | .39 | -5.027 | .527  |
| Post | Follow-up | .000   | .970  | 1.000 |     | -2.614 | 2.614 |

\* The mean difference is significant at the .05 level.

<sup>a</sup> Adjustment for multiple comparison: Bonferroni.

**NOTE: We didn't find any checklist specifically for our study design (one group pre-post design)**

STROBE Statement—checklist of items that should be included in reports of observational studies

|                              | Item No | Recommendation                                                                                                                                                                                                                                                                                                                                                                                                                                                                                                                                                                                                                                                                                                                    |
|------------------------------|---------|-----------------------------------------------------------------------------------------------------------------------------------------------------------------------------------------------------------------------------------------------------------------------------------------------------------------------------------------------------------------------------------------------------------------------------------------------------------------------------------------------------------------------------------------------------------------------------------------------------------------------------------------------------------------------------------------------------------------------------------|
| <b>Title and abstract</b>    | 1       | (a) Indicate the study's design with a commonly used term in the title or the abstract: <b><u>Page 1</u></b><br>(b) Provide in the abstract an informative and balanced summary of what was done and what was found: <b><u>Page 2 &amp; 3</u></b>                                                                                                                                                                                                                                                                                                                                                                                                                                                                                 |
| <b>Introduction</b>          |         |                                                                                                                                                                                                                                                                                                                                                                                                                                                                                                                                                                                                                                                                                                                                   |
| Background/rationale         | 2       | Explain the scientific background and rationale for the investigation being reported: <b><u>Page 4 &amp; 5</u></b>                                                                                                                                                                                                                                                                                                                                                                                                                                                                                                                                                                                                                |
| Objectives                   | 3       | State specific objectives, including any prespecified hypotheses: <b><u>Page 5</u></b>                                                                                                                                                                                                                                                                                                                                                                                                                                                                                                                                                                                                                                            |
| <b>Methods</b>               |         |                                                                                                                                                                                                                                                                                                                                                                                                                                                                                                                                                                                                                                                                                                                                   |
| Study design                 | 4       | Present key elements of study design early in the paper: <b><u>Page 5 &amp; 6</u></b>                                                                                                                                                                                                                                                                                                                                                                                                                                                                                                                                                                                                                                             |
| Setting                      | 5       | Describe the setting, locations, and relevant dates, including periods of recruitment, exposure, follow-up, and data collection: <b><u>Page 6 &amp; 7</u></b>                                                                                                                                                                                                                                                                                                                                                                                                                                                                                                                                                                     |
| Participants                 | 6       | (a) <i>Cohort study</i> —Give the eligibility criteria, and the sources and methods of selection of participants. Describe methods of follow-up:<br><i>Case-control study</i> —Give the eligibility criteria, and the sources and methods of case ascertainment and control selection. Give the rationale for the choice of cases and controls<br><i>Cross-sectional study</i> —Give the eligibility criteria, and the sources and methods of selection of participants<br><b><u>Page 6 &amp; 7</u></b><br>(b) <i>Cohort study</i> —For matched studies, give matching criteria and number of exposed and unexposed<br><i>Case-control study</i> —For matched studies, give matching criteria and the number of controls per case |
| Variables                    | 7       | Clearly define all outcomes, exposures, predictors, potential confounders, and effect modifiers. Give diagnostic criteria, if applicable: <b><u>Page 9, 10 &amp; 11</u></b>                                                                                                                                                                                                                                                                                                                                                                                                                                                                                                                                                       |
| Data sources/<br>measurement | 8*      | For each variable of interest, give sources of data and details of methods of assessment (measurement). Describe comparability of assessment methods if there is more than one group: <b><u>Page 8</u></b>                                                                                                                                                                                                                                                                                                                                                                                                                                                                                                                        |
| Bias                         | 9       | Describe any efforts to address potential sources of bias: <b><u>Page 11</u></b>                                                                                                                                                                                                                                                                                                                                                                                                                                                                                                                                                                                                                                                  |
| Study size                   | 10      | Explain how the study size was arrived at: <b><u>Page 13, 14 &amp; 15</u></b>                                                                                                                                                                                                                                                                                                                                                                                                                                                                                                                                                                                                                                                     |
| Quantitative variables       | 11      | Explain how quantitative variables were handled in the analyses. If applicable, describe which groupings were chosen and why: <b><u>Page 11</u></b>                                                                                                                                                                                                                                                                                                                                                                                                                                                                                                                                                                               |
| Statistical methods          | 12      | (a) Describe all statistical methods, including those used to control for confounding: <b><u>Page 11</u></b><br>(b) Describe any methods used to examine subgroups and interactions<br>(c) Explain how missing data were addressed<br>(d) <i>Cohort study</i> —If applicable, explain how loss to follow-up was addressed<br><i>Case-control study</i> —If applicable, explain how matching of cases and controls was addressed                                                                                                                                                                                                                                                                                                   |

1  
2 *Cross-sectional study*—If applicable, describe analytical methods taking account of  
3 sampling strategy

---

4 (e) Describe any sensitivity analyses

5  
6 Continued on next page

7  
8  
9  
10  
11  
12  
13  
14  
15  
16  
17  
18  
19  
20  
21  
22  
23  
24  
25  
26  
27  
28  
29  
30  
31  
32  
33  
34  
35  
36  
37  
38  
39  
40  
41  
42  
43  
44  
45  
46  
47  
48  
49  
50  
51  
52  
53  
54  
55  
56  
57  
58  
59  
60

For peer review only

**Results**

|                  |     |                                                                                                                                                                                                                                                                                                                                                                                                                                                      |
|------------------|-----|------------------------------------------------------------------------------------------------------------------------------------------------------------------------------------------------------------------------------------------------------------------------------------------------------------------------------------------------------------------------------------------------------------------------------------------------------|
| Participants     | 13* | (a) Report numbers of individuals at each stage of study—eg numbers potentially eligible, examined for eligibility, confirmed eligible, included in the study, completing follow-up, and analysed: <b>Page 13, 14 &amp; 15</b><br>(b) Give reasons for non-participation at each stage : <b>page 13, 14 &amp; 15.</b><br>(c) Consider use of a flow diagram                                                                                          |
| Descriptive data | 14* | (a) Give characteristics of study participants (eg demographic, clinical, social) and information on exposures and potential confounders: <b>Page 13</b><br>(b) Indicate number of participants with missing data for each variable of interest <b>NA</b><br>(c) <i>Cohort study</i> —Summarise follow-up time (eg, average and total amount)                                                                                                        |
| Outcome data     | 15* | <i>Cohort study</i> —Report numbers of outcome events or summary measures over time<br><i>Case-control study</i> —Report numbers in each exposure category, or summary measures of exposure<br><i>Cross-sectional study</i> —Report numbers of outcome events or summary measures                                                                                                                                                                    |
| Main results     | 16  | (a) Give unadjusted estimates and, if applicable, confounder-adjusted estimates and their precision (eg, 95% confidence interval). Make clear which confounders were adjusted for and why they were included<br>(b) Report category boundaries when continuous variables were categorized<br>(c) If relevant, consider translating estimates of relative risk into absolute risk for a meaningful time period<br><b>Page 15, 16, 17, 18 &amp; 19</b> |
| Other analyses   | 17  | Report other analyses done—eg analyses of subgroups and interactions, and sensitivity analyses                                                                                                                                                                                                                                                                                                                                                       |

**Discussion**

|                  |    |                                                                                                                                                                                                             |
|------------------|----|-------------------------------------------------------------------------------------------------------------------------------------------------------------------------------------------------------------|
| Key results      | 18 | Summarise key results with reference to study objectives: <b>Page 19</b>                                                                                                                                    |
| Limitations      | 19 | Discuss limitations of the study, taking into account sources of potential bias or imprecision. Discuss both direction and magnitude of any potential bias: <b>Page 22</b>                                  |
| Interpretation   | 20 | Give a cautious overall interpretation of results considering objectives, limitations, multiplicity of analyses, results from similar studies, and other relevant evidence: <b>Page 19, 20, 22 &amp; 22</b> |
| Generalisability | 21 | Discuss the generalisability (external validity) of the study results <b>NA (Proof-of-concept design, not in the objectives)</b>                                                                            |

**Other information**

|         |    |                                                                                                                                                                               |
|---------|----|-------------------------------------------------------------------------------------------------------------------------------------------------------------------------------|
| Funding | 22 | Give the source of funding and the role of the funders for the present study and, if applicable, for the original study on which the present article is based: <b>Page 24</b> |
|---------|----|-------------------------------------------------------------------------------------------------------------------------------------------------------------------------------|

\*Give information separately for cases and controls in case-control studies and, if applicable, for exposed and unexposed groups in cohort and cross-sectional studies.

**Note:** An Explanation and Elaboration article discusses each checklist item and gives methodological background and published examples of transparent reporting. The STROBE checklist is best used in conjunction with this article (freely available on the Web sites of PLoS Medicine at <http://www.plosmedicine.org/>, Annals of Internal Medicine at <http://www.annals.org/>, and Epidemiology at <http://www.epidem.com/>). Information on the STROBE Initiative is available at [www.strobe-statement.org](http://www.strobe-statement.org).
