# Supplementary material for: Developing professional caregivers’ empathy and emotional competencies through mindfulness-based stress reduction (MBSR): results of two proof-of-concept studies
Source: PubMed Central journal article supplement — BMJ Open. 2018 Jan 5;8(1):e018421. doi: 10.1136/bmjopen-2017-018421 (PMC5781061; doi:10.1136/bmjopen-2017-018421), 2018-01-05
Supplement: bmjopen-2017-018421supp002.pdf [file bmjopen-2017-018421supp002.pdf]

*Developing Professional Caregivers' Empathy and Emotional Competencies Through Mindfulness-Based Stress Reduction (MBSR): Results of two Proof-of-Concept Studies*

**SUPPLEMENTARY TABLES**

**Centre de Psycho-Oncologie**  
Department of Hematology-Oncology  
Centre Hospitalier Universitaire Sainte-Justine  
3175 Chemin de la Côte Sainte-Catherine  
Montreal, Quebec, Canada H3T 1C5

Table S1  
*Study 1 and Study 2 Participants Compared at Baseline*

| Measure                                     | Study 1<br>(Students, N = 12) |           | Study 2<br>(Professionals, N = 25) |           | Study 1 vs Study 2<br>Scores at Baseline |           |          |          |
|---------------------------------------------|-------------------------------|-----------|------------------------------------|-----------|------------------------------------------|-----------|----------|----------|
|                                             | <i>M</i>                      | <i>SD</i> | <i>M</i>                           | <i>SD</i> | <i>t</i>                                 | <i>df</i> | <i>p</i> | <i>d</i> |
| Mindfulness (MAAS)                          | 3.11                          | .67       | 3.27                               | .13       | 1.166                                    | 35        | .256     | .41      |
| Perspective Taking (IRI)                    | 2.58                          | .52       | 2.63                               | .67       | .227                                     | 35        | .822     | .08      |
| Empathic Concern (IRI)                      | 2.79                          | .31       | 2.96                               | .63       | .880                                     | 35        | .385     | .31      |
| Identify my Emotions (PEC)                  | 3.07                          | .88       | 3.47                               | .64       | 1.573                                    | 35        | .125     | .55      |
| Identify Others' Emotions (PEC)             | 3.97                          | .69       | 3.86                               | .60       | .497                                     | 35        | .622     | .18      |
| Acceptance (AAQ-II)                         | 42.25                         | 10.83     | 44.08                              | 7.85      | .586                                     | 35        | .562     | .21      |
| Expressive Suppression (ERQ)                | 2.75                          | .81       | 3.18                               | 1.09      | 1.212                                    | 35        | .234     | .43      |
| Recognition of Emotions (GERT) <sup>a</sup> | 58.58                         | 4.01      | 52.89                              | 11.29     | 1.69                                     | 35        | .106     | .59      |

<sup>a</sup> Study 2 GERT's mean was adjusted to take into account the difference in the number of items between the 2 versions of the task (83-item GERT for Study 1 and 42-item GERT-S for Study 2)

Table S2  
*Study 2 Results of Pairwise Comparisons across time on outcomes measured at pre, post, follow-up of an MBSR-based program followed by 25 paediatric haematology-oncology professionals*

| Measure                         | (I) Time | (J) Time  | Mean Difference (I-J) | SE    | <i>p</i> <sup>a</sup> | <i>d</i> | 95% confidence interval for difference <sup>a</sup> |             |
|---------------------------------|----------|-----------|-----------------------|-------|-----------------------|----------|-----------------------------------------------------|-------------|
|                                 |          |           |                       |       |                       |          | Lower Bound                                         | Upper Bound |
| Mindfulness (MAAS)              | Pre      | Post      | -.903*                | .140  | .000                  | 1.72     | -1.264                                              | -.541       |
|                                 | Pre      | Follow-up | -.719*                | .114  | .000                  | 1.54     | -1.014                                              | -.425       |
|                                 | Post     | Follow up | .183                  | .075  | .069                  |          | -.011                                               | .378        |
| Perspective Taking (IRI)        | Pre      | Post      | -.310*                | .094  | .009                  | .50      | -.551                                               | -.068       |
|                                 | Pre      | Follow-up | -.143                 | .108  | .594                  | .23      | -.421                                               | .135        |
|                                 | Post     | Follow up | .167                  | .066  | .056                  |          | -.337                                               | .003        |
| Empathic Concern (IRI)          | Pre      | Post      | -.024                 | .102  | 1.00                  | .04      | -.283                                               | .236        |
|                                 | Pre      | Follow-up | -.012                 | .112  | 1.00                  | .02      | -.300                                               | .277        |
|                                 | Post     | Follow up | .012                  | .119  | 1.00                  |          | -.294                                               | .318        |
| Identify my Emotions (PCE)      | Pre      | Post      | -.533*                | .116  | .000                  | .90      | .234                                                | .833        |
|                                 | Pre      | Follow-up | -.542*                | .121  | .001                  | .89      | -.855                                               | -.229       |
|                                 | Post     | Follow up | -.008                 | .081  | 1.000                 |          | -.201                                               | .218        |
| Identify Others' Emotions (PCE) | Pre      | Post      | -.133                 | .095  | .515                  | .24      | -.377                                               | .111        |
|                                 | Pre      | Follow-up | -.092                 | .104  | 1.000                 | .15      | -.361                                               | .177        |
|                                 | Post     | Follow-up | .042                  | .072  | 1.000                 |          | -.145                                               | .228        |
| ACCEPTANCE (AAQ-II)             | Pre      | Post      | -7.458*               | 1.137 | .000                  | .93      | -10.395                                             | -4.522      |
|                                 | Pre      | Follow-up | -7.792*               | 1.273 | .000                  | .96      | -11.078                                             | -4.506      |
|                                 | Post     | Follow-up | -.333                 | 1.266 | 1.000                 |          | -3.603                                              | 2.937       |

EXPRESSIVE SUPPRESSION  
(ERQ)

|      |           |       |      |       |     |       |      |
|------|-----------|-------|------|-------|-----|-------|------|
| Pre  | Post      | .500* | .171 | .023  | .45 | .059  | .941 |
| Pre  | Follow-up | .438  | .209 | .143  | .40 | -.103 | .978 |
| Post | Follow-up | -.063 | .168 | 1.000 |     | -.497 | .372 |

EMOTION RECOGNITION  
(GERT)

|      |           |        |       |       |     |        |       |
|------|-----------|--------|-------|-------|-----|--------|-------|
| Pre  | Post      | -2.250 | 1.213 | .250  | .45 | -5.517 | 1.017 |
| Pre  | Follow-up | -2.250 | 1.031 | .136  | .39 | -5.027 | .527  |
| Post | Follow-up | .000   | .970  | 1.000 |     | -2.614 | 2.614 |

\* The mean difference is significant at the .05 level.

<sup>a</sup> Adjustment for multiple comparison: Bonferroni.
